# Supplementary material for: Subcutaneous nanotherapy repurposes the immunosuppressive mechanism of rapamycin to enhance allogeneic islet graft viability
Source: Research Square preprint supplement (doi:10.21203/rs.3.rs-92015/v1), 2020-11-09
Supplement: Supplementary file 1 [file 76053a6b5cc44182ad3ed8fd.pdf]

# Supplementary Information

## **Subcutaneous nanotherapy repurposes the immunosuppressive mechanism of rapamycin to enhance allogeneic islet graft viability**

*Authors:* Jacqueline A. Burke<sup>1,2</sup>, Xiaomin Zhang<sup>3</sup>, Sharan Kumar Reddy Bobbala<sup>1</sup>, Molly A. Frey<sup>3,4</sup>, Carolina Bohorquez Fuentes<sup>1,2</sup>, Helena Freire Haddad<sup>1,2</sup>, Sean D. Allen<sup>4</sup>, Reese A.K. Richardson<sup>4</sup>, Guillermo A. Ameer<sup>1,2,3,4,5,6\*</sup>, Evan A. Scott<sup>1,2,4,5,6\*</sup>

### *Author Affiliations:*

1. Department of Biomedical Engineering, Northwestern University, 2145 Sheridan Road, E311, Evanston, IL 60208;
2. Center for Advanced Regenerative Engineering, Northwestern University, 2145 Sheridan Road, E311, Evanston, IL 60208;
3. Feinberg School of Medicine, Northwestern University, 420 E. Superior Street, Chicago, IL 60611;
4. Interdisciplinary Biological Sciences, Northwestern University, 2205 Tech Drive, Evanston, IL 60208;
5. Simpson Querrey Institute, Northwestern University, 303 E. Superior Street, 11th Floor, Chicago, IL 60611;
6. International Institute for Nanotechnology, Northwestern University, 2145 Sheridan Road, K111, Evanston, IL 60208

### *Co-Corresponding Authors:*

Evan A. Scott, Ph.D.  
Department of Biomedical Engineering  
Northwestern University  
2145 Sheridan Road Silverman Hall 4613  
Evanston, IL 60208  
Phone: 847-467-6719  
E-mail: [evan.scott@northwestern.edu](mailto:evan.scott@northwestern.edu)

Guillermo A. Ameer, Sc.D.  
Department of Biomedical Engineering  
Northwestern University  
2145 Sheridan Road B382  
Evanston, IL 60208  
Phone: 847-491-4928  
E-mail: [g-ameer@northwestern.edu](mailto:g-ameer@northwestern.edu)

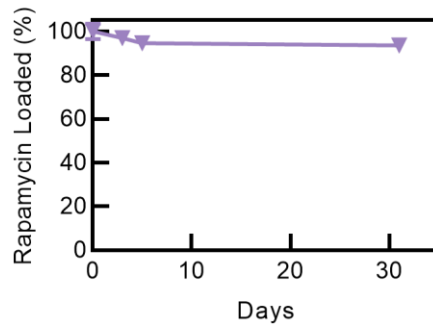

**Fig. S1 | Characterization of rapamycin-loaded polymersomes (rPS) encapsulation stability.** rPS were fabricated, unencapsulated rapamycin was removed and rPS samples were stored at 4 °C in phosphate buffered saline (PBS) at a concentration of 0.125 mg rapamycin/ml. At various time points, released rapamycin was removed and loaded rapamycin concentration was assessed via HPLC-UV. (n = 3-5).

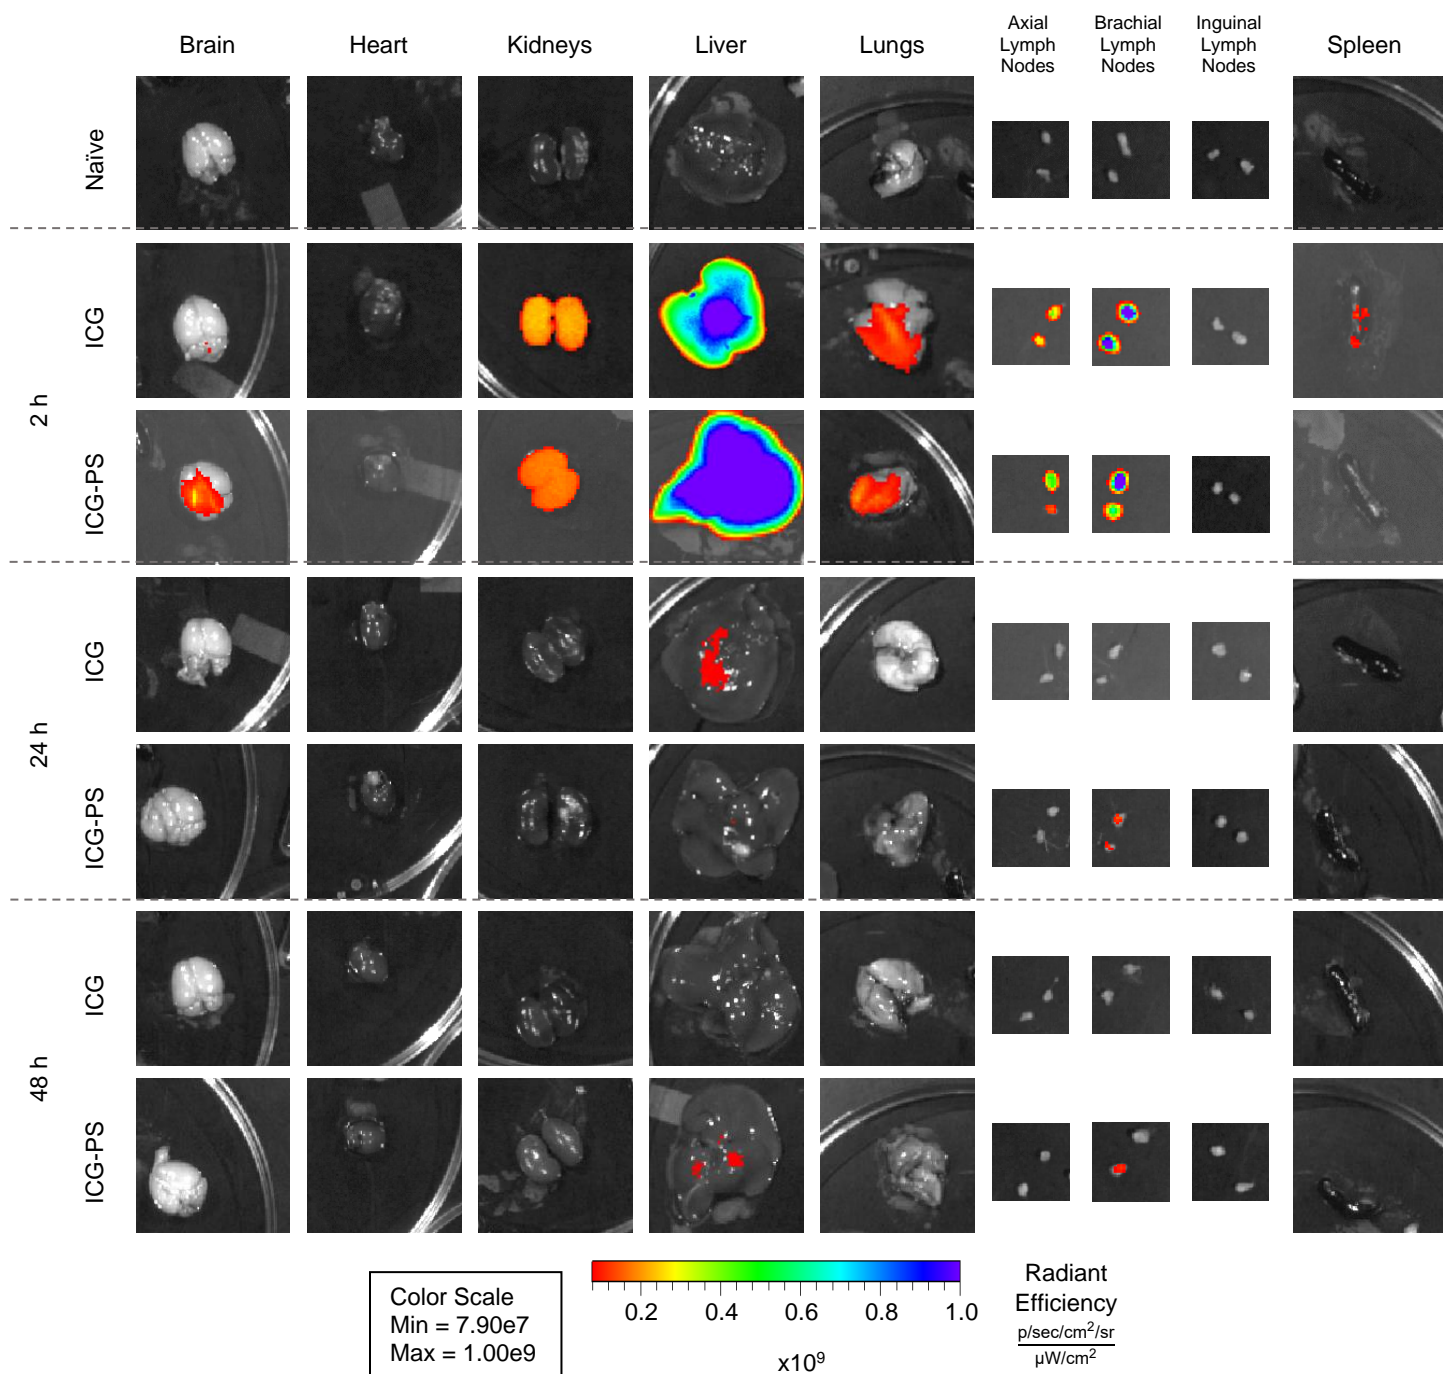

**Fig. S2 | Biodistribution of indocyanine green (ICG) dye and ICG loaded in to polymersomes (ICG-PS).** Mice were subcutaneously injected with ICG-PS or ICG and sacrificed at 2, 24 and 48 hours after injection (n = 5 mice). IVIS was performed on extracted organs to quantify ICG dye.

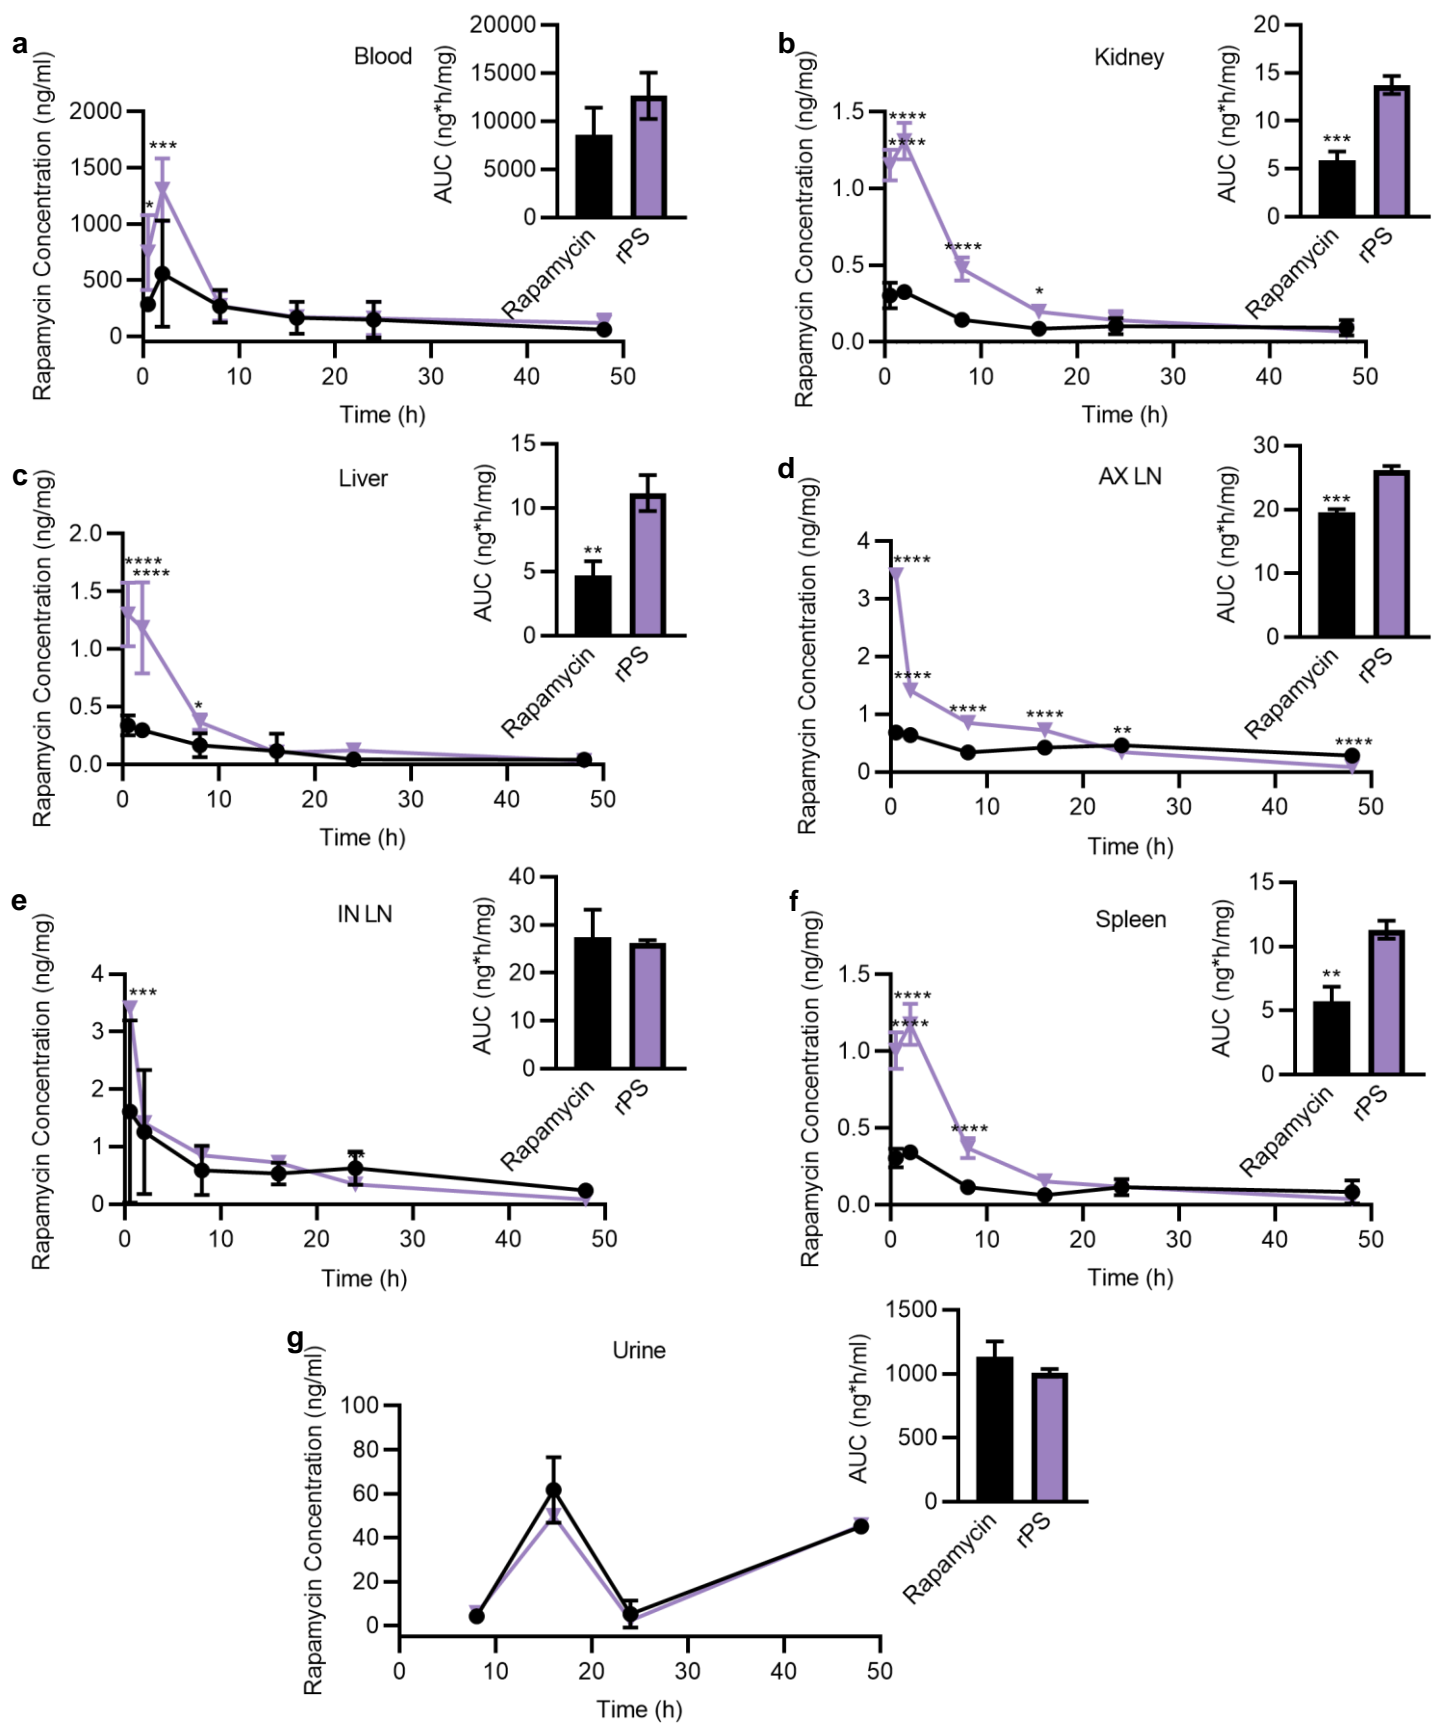

**Fig. S3 | Biodistribution of rapamycin by formulation.** Rapamycin concentration in the **a**, blood, **b**, kidneys, **c**, liver, **d**, axillary lymphocenter (deep axillary/axillary/axial and superficial axillary/brachial lymph nodes; AX LN), **e**, subiliac lymphocenter (subiliac/inguinal lymph nodes; IN LN) **f**, spleen and **g**, urine 0.5 h, 2 h, 8 h, 16 h, 24 h and 48 h after a single subcutaneous injection of rapamycin (in 0.2% carboxymethyl cellulose (CMC)) (—■—) or rPS (—▼—). Rapamycin concentration was also analyzed in the lungs, brain, heart, and fat; concentrations were below 1 ng/mg for both rapamycin and rPS at all timepoints. Analysis was performed using LC-MS/MS. (n = 3 mice/group).

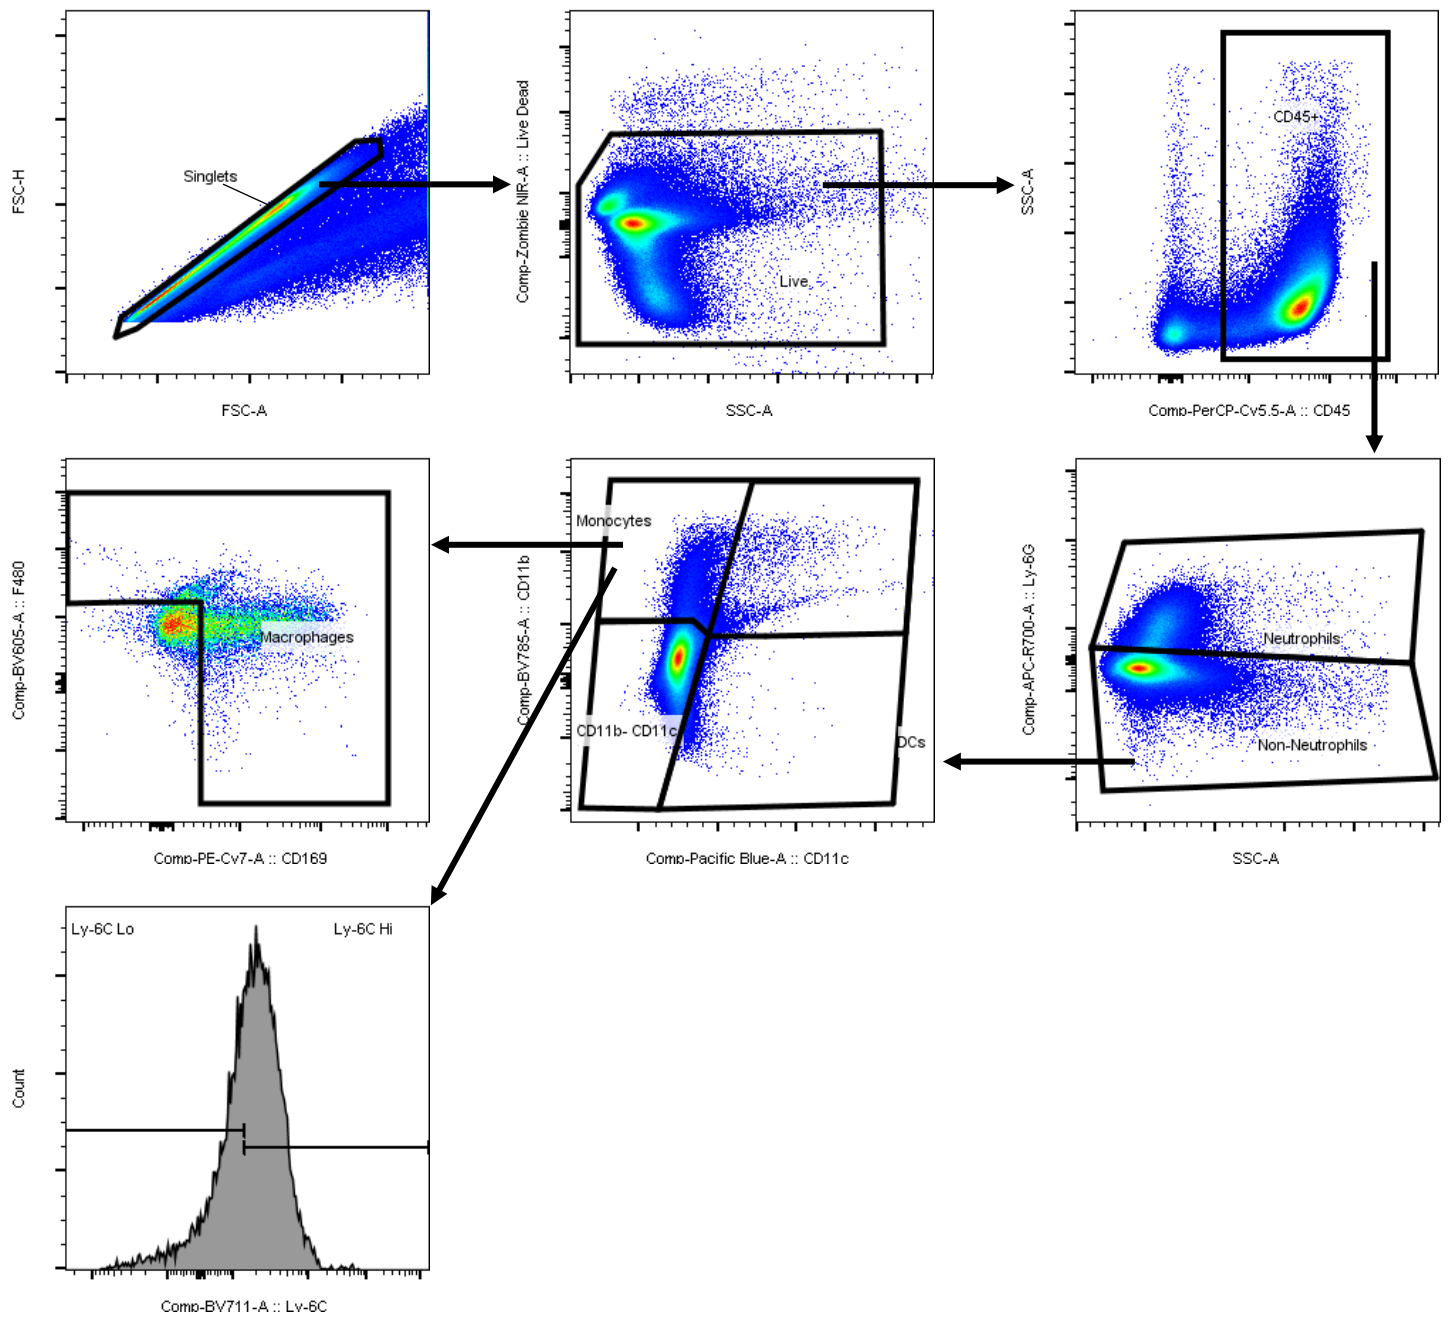

**Fig. S4 | Gating strategy for cell populations in flow cytometry studies.** Representative pseudocolor plots and histograms are displayed from an example mouse lymph node.

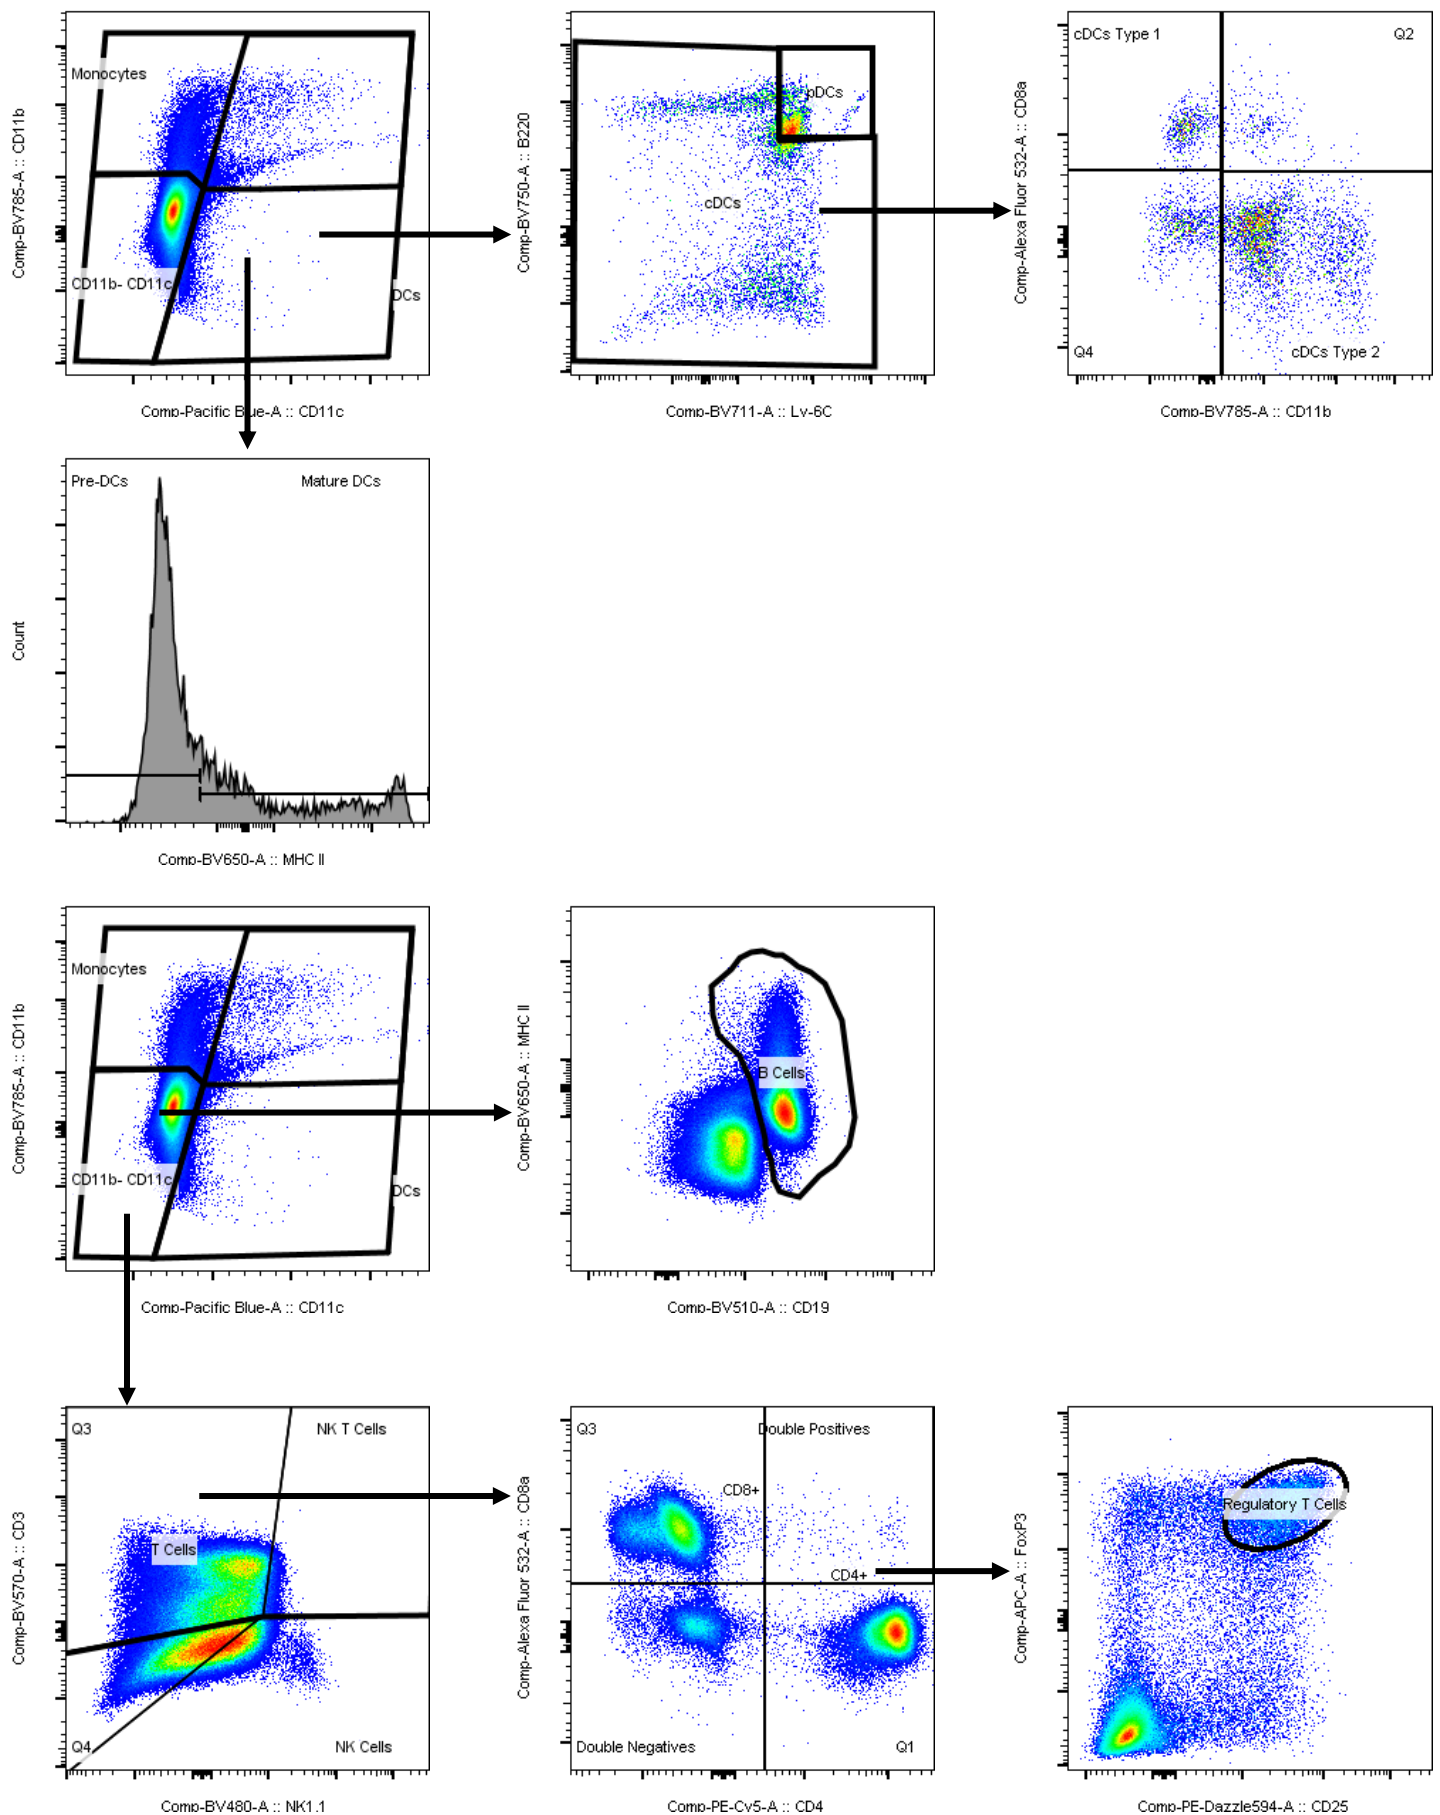

**Fig. S4 (continued) | Gating strategy for cell populations in flow cytometry studies.** Representative pseudocolor plots and histograms are displayed from an example mouse lymph node.



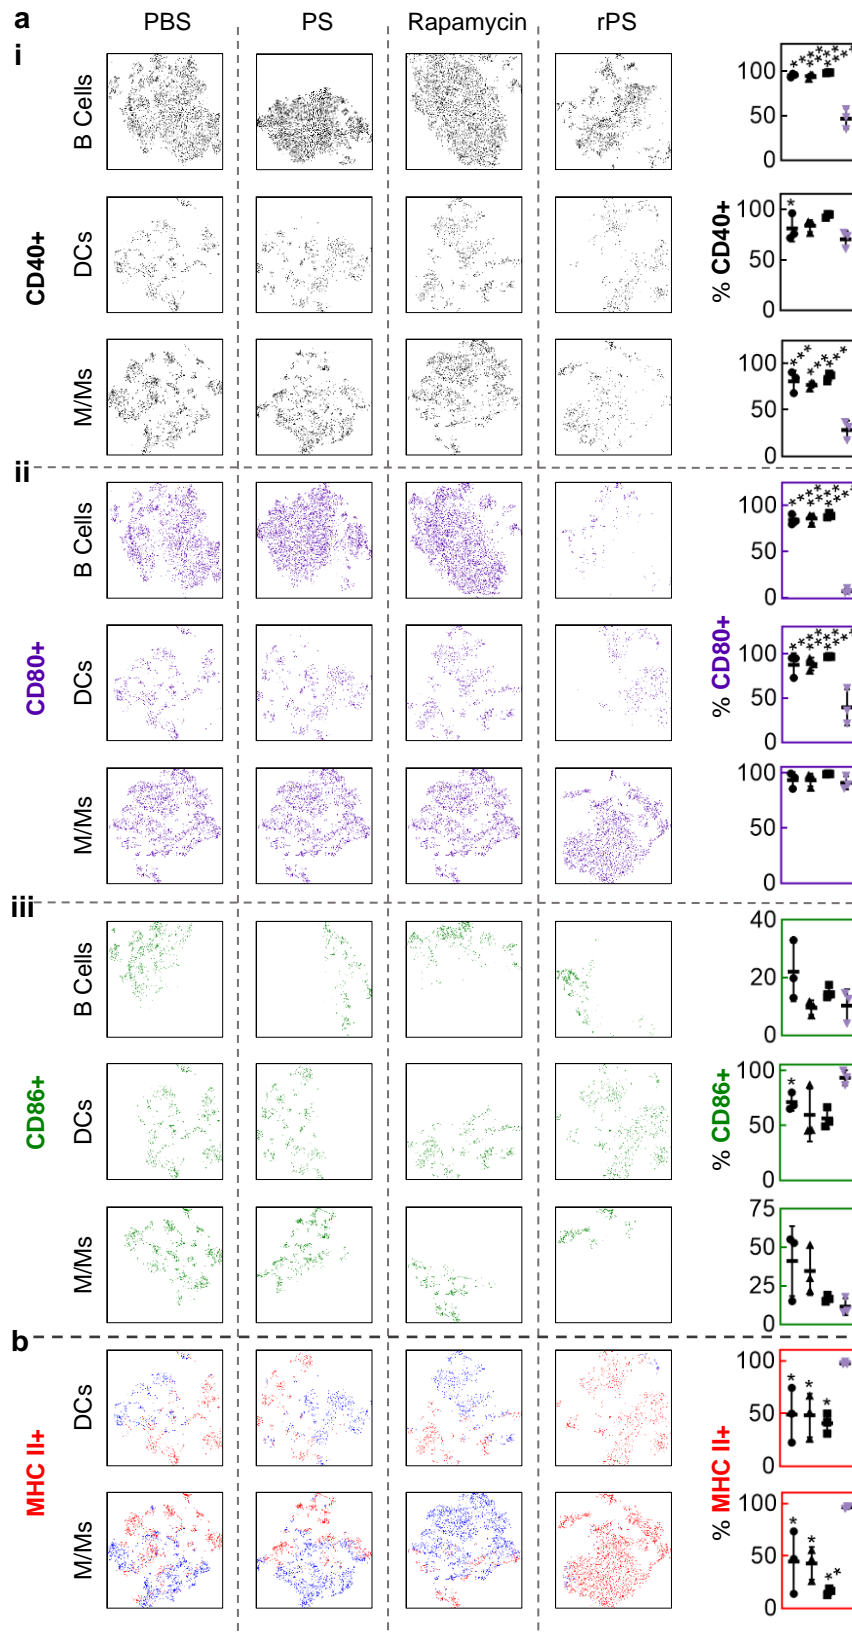

**Fig. S5 | Coreceptor and MHC II expression in blood.** Flow cytometry analysis of CD45<sup>+</sup> cell populations from mice subcutaneously injected with phosphate buffered saline (PBS; ●), polymersomes (PS; ▲), rapamycin (■) or rapamycin-loaded polymersomes (rPS; ▼) using the standard dosage protocol (11 injections, 1 mg/kg rapamycin or equivalent). **a**, tSNE visualization of coreceptor CD40 (**a i**; black), CD80 (**a ii**; purple) and CD86 (**a iii**; forest green) positive B cells, dendritic cells (DCs) and monocyte-and-macrophage-lineage cells (M/Ms). **b**, tSNE visualization of major-histocompatibility complex (MHC) II presentation (MHC II<sup>+</sup> red; MHC II<sup>-</sup> blue) on DCs and M/Ms. All data are presented as mean percentage (of DCs or M/Ms)  $\pm$  SD with \* $p < 0.05$ ; \*\*  $p < 0.01$ ; \*\*\*  $p < 0.001$ ; \*\*\*\*  $p < 0.0001$  relative to rPS treatment. Statistical significance was determined by one-way ANOVA with Tukey's multiple comparisons test.

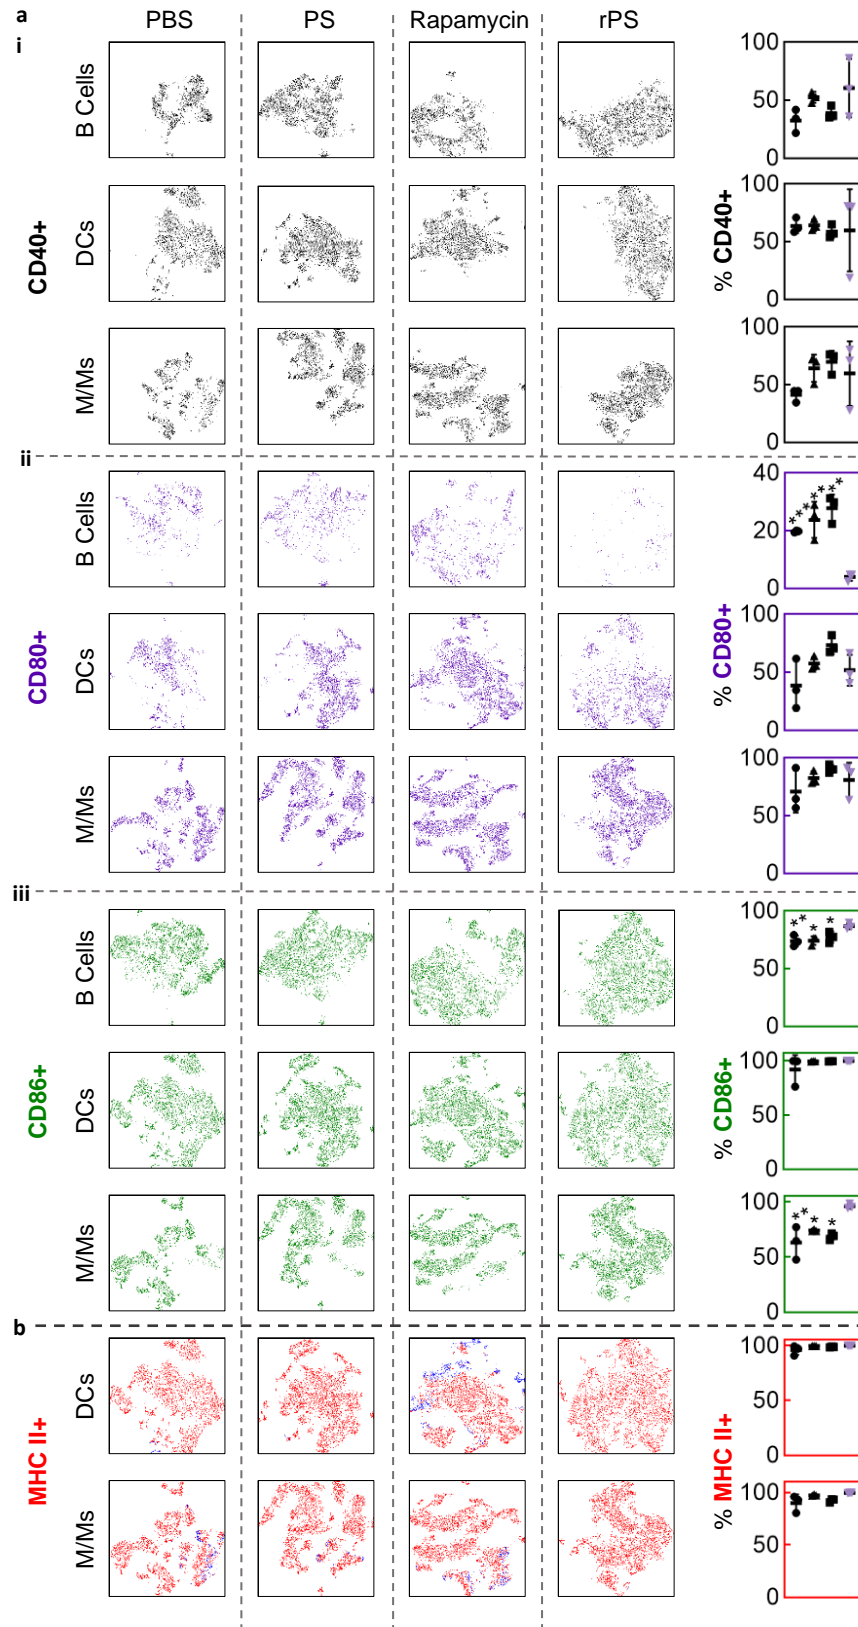

**Fig. S6 | Coreceptor and MHC II expression in liver.** Flow cytometry analysis of CD45<sup>+</sup> cell populations from mice subcutaneously injected with phosphate buffered saline (PBS; ●), polymersomes (PS; ▲), rapamycin (■) or rapamycin-loaded polymersomes (rPS; ▼) using the standard dosage protocol (11 injections, 1 mg/kg rapamycin or equivalent). **a**, tSNE visualization of coreceptor CD40 (**a i**; black), CD80 (**a ii**; purple) and CD86 (**a iii**; forest green) positive B cells, dendritic cells (DCs) and monocyte-and-macrophage-lineage cells (M/Ms). **b**, tSNE visualization of major-histocompatibility complex (MHC) II presentation (MHC II<sup>+</sup> red; MHC II<sup>-</sup> blue) on DCs and M/Ms. All data are presented as mean percentage (of DCs or M/Ms) ± SD with \*p<0.05; \*\* p<0.01; \*\*\* p<0.001; \*\*\*\* p<0.0001 relative to rPS treatment. Statistical significance was determined by one-way ANOVA with Tukey's multiple comparisons test.



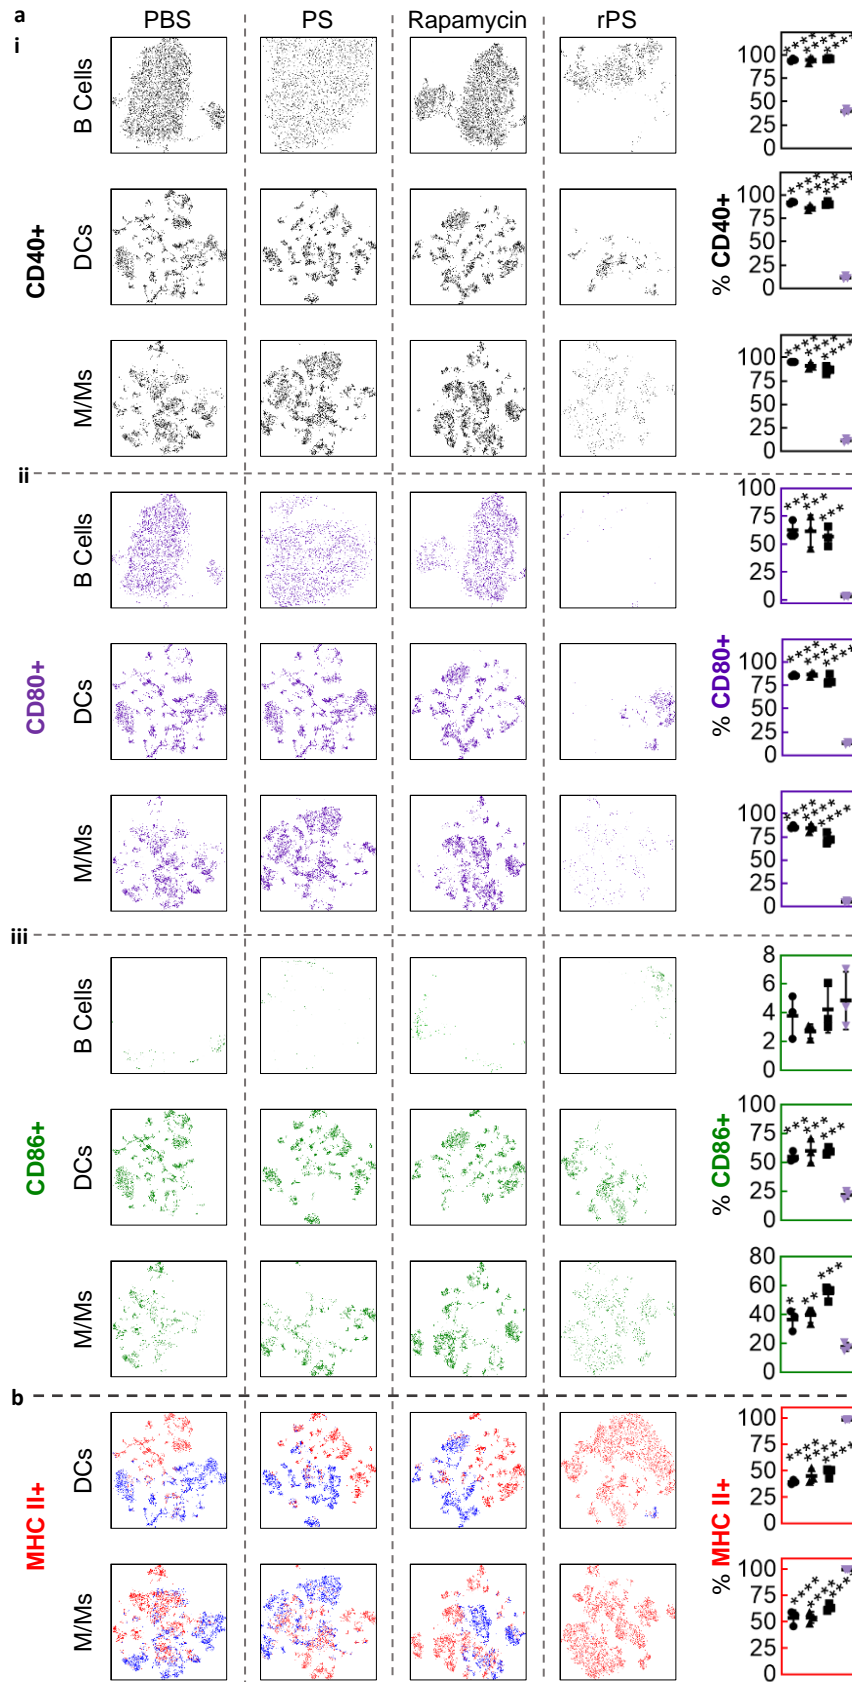

**Fig. S7 | Coreceptor and MHC II expression in AX LN.** Flow cytometry analysis of CD45+ cell populations from mice subcutaneously injected with phosphate buffered saline (PBS; ●), polymersomes (PS; ▲), rapamycin (■) or rapamycin-loaded polymersomes (rPS; ▼) using the standard dosage protocol (11 injections, 1 mg/kg rapamycin or equivalent). **a**, tSNE visualization of coreceptor CD40 (**a i**; black), CD80 (**a ii**; purple) and CD86 (**a iii**; forest green) positive B cells, dendritic cells (DCs) and monocyte-and-macrophage-lineage cells (M/Ms). **b**, tSNE visualization of major-histocompatibility complex (MHC) II presentation (MHC II+ red; MHC II- blue) on DCs and M/Ms. All data are presented as mean percentage (of DCs or M/Ms)  $\pm$  SD with \* $p < 0.05$ ; \*\*  $p < 0.01$ ; \*\*\*  $p < 0.001$ ; \*\*\*\*  $p < 0.0001$  relative to rPS treatment. Statistical significance was determined by one-way ANOVA with Tukey's multiple comparisons test. AX LN: axillary lymphocenter (deep axillary/axillary/axial and superficial axillary/brachial lymph nodes).

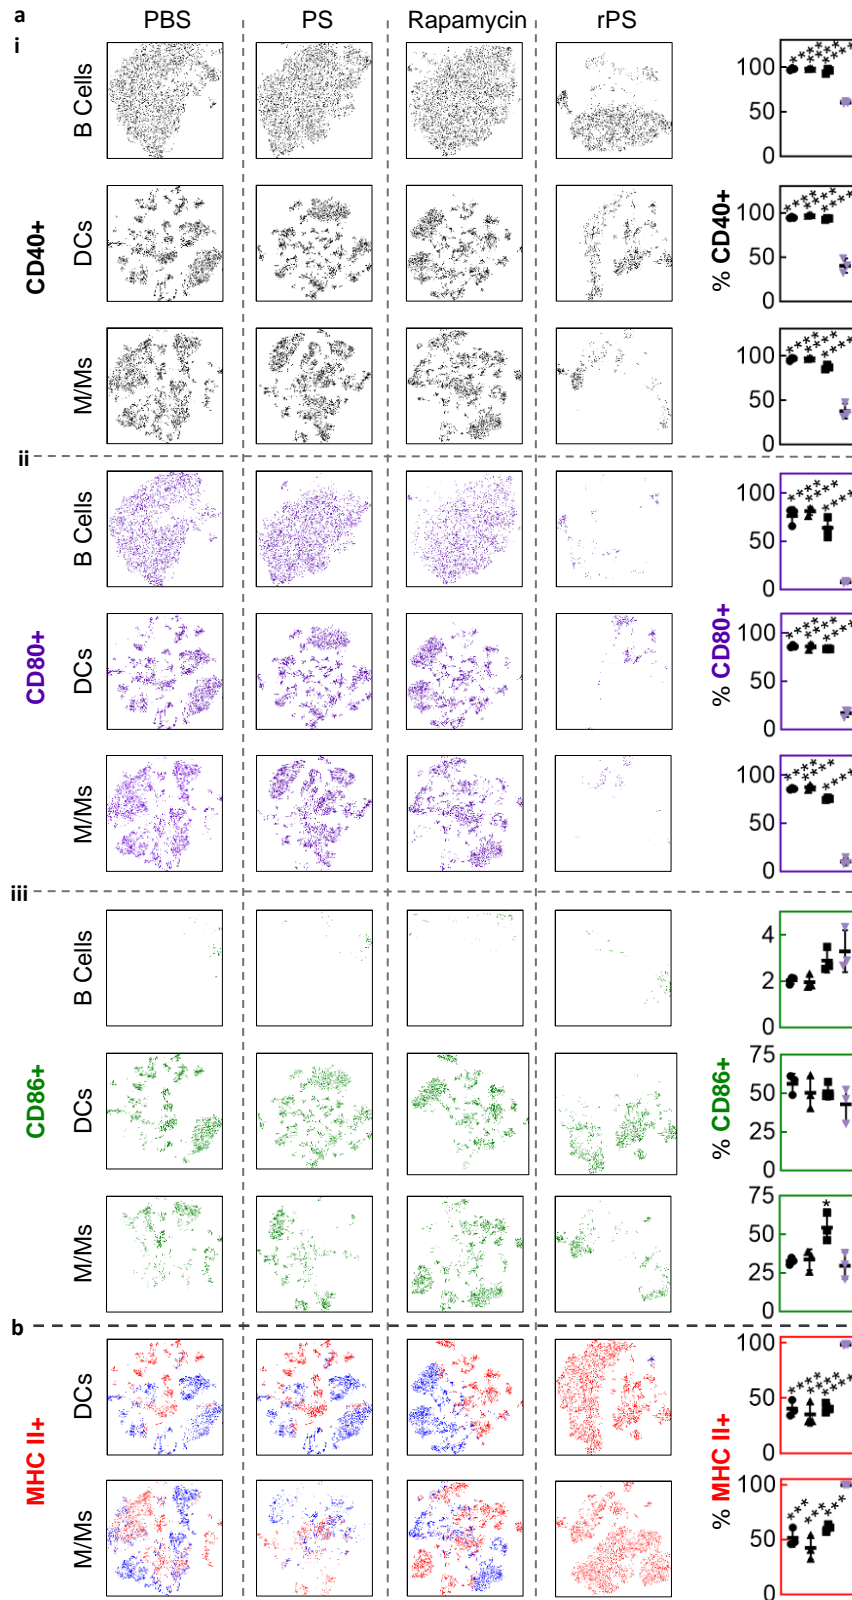

**Fig. S8 | Coreceptor and MHC II expression in IN LN.** Flow cytometry analysis of CD45<sup>+</sup> cell populations from mice subcutaneously injected with phosphate buffered saline (PBS; ●), polymersomes (PS; ▲), rapamycin (■) or rapamycin-loaded polymersomes (rPS; ▼) using the standard dosage protocol (11 injections, 1 mg/kg rapamycin or equivalent). **a**, tSNE visualization of coreceptor CD40 (**a i**; black), CD80 (**a ii**; purple) and CD86 (**a iii**; forest green) positive B cells, dendritic cells (DCs) and monocyte-and-macrophage-lineage cells (M/Ms). **b**, tSNE visualization of major-histocompatibility complex (MHC) II presentation (MHC II<sup>+</sup> red; MHC II<sup>-</sup> blue) on DCs and M/Ms. All data are presented as mean percentage (of DCs or M/Ms)  $\pm$  SD with \* $p < 0.05$ ; \*\* $p < 0.01$ ; \*\*\* $p < 0.001$ ; \*\*\*\* $p < 0.0001$  relative to rPS treatment. Statistical significance was determined by one-way ANOVA with Tukey's multiple comparisons test. IN LN: subiliac lymphocenter (subiliac/inguinal lymph nodes).

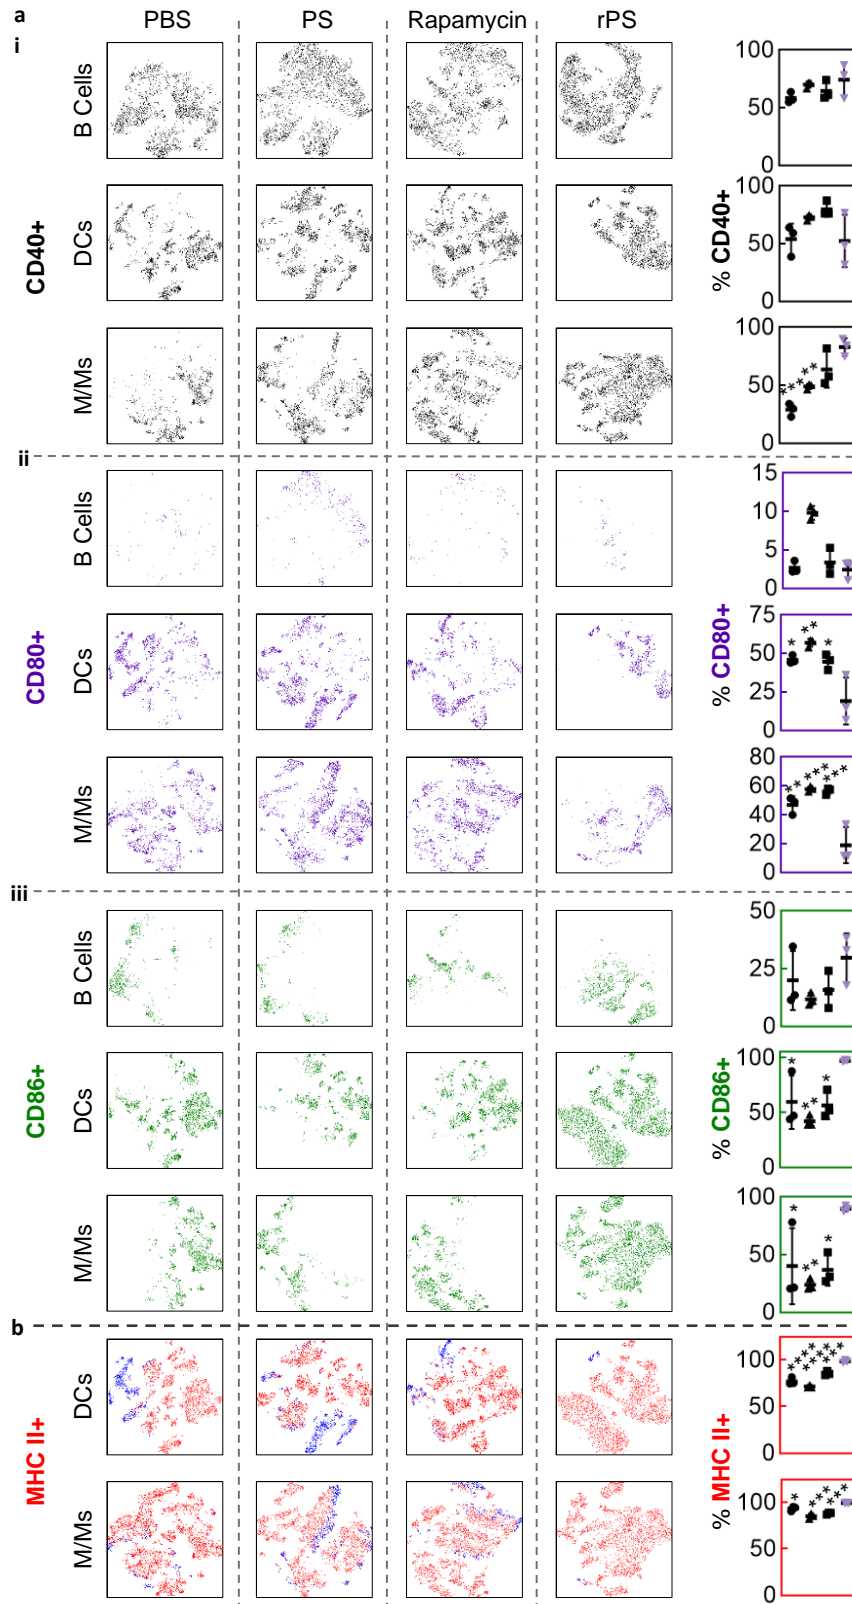

**Fig. S9 | Coreceptor and MHC II expression in the spleen.** Flow cytometry analysis of CD45<sup>+</sup> cell populations from mice subcutaneously injected with phosphate buffered saline (PBS; ●), polymersomes (PS; ▲), rapamycin (■) or rapamycin-loaded polymersomes (rPS; ▼) using the standard dosage protocol (11 injections, 1 mg/kg rapamycin or equivalent). **a**, tSNE visualization of coreceptor CD40 (**a i**; black), CD80 (**a ii**; purple) and CD86 (**a iii**; forest green) positive B cells, dendritic cells (DCs) and monocyte-and-macrophage-lineage cells (M/Ms). **b**, tSNE visualization of major-histocompatibility complex (MHC) II presentation (MHC II+ red; MHC II- blue) on DCs and M/Ms. All data are presented as mean percentage (of DCs or M/Ms)  $\pm$  SD with \* $p < 0.05$ ; \*\*  $p < 0.01$ ; \*\*\*  $p < 0.001$ ; \*\*\*\*  $p < 0.0001$  relative to rPS treatment. Statistical significance was determined by one-way ANOVA with Tukey's multiple comparisons test.

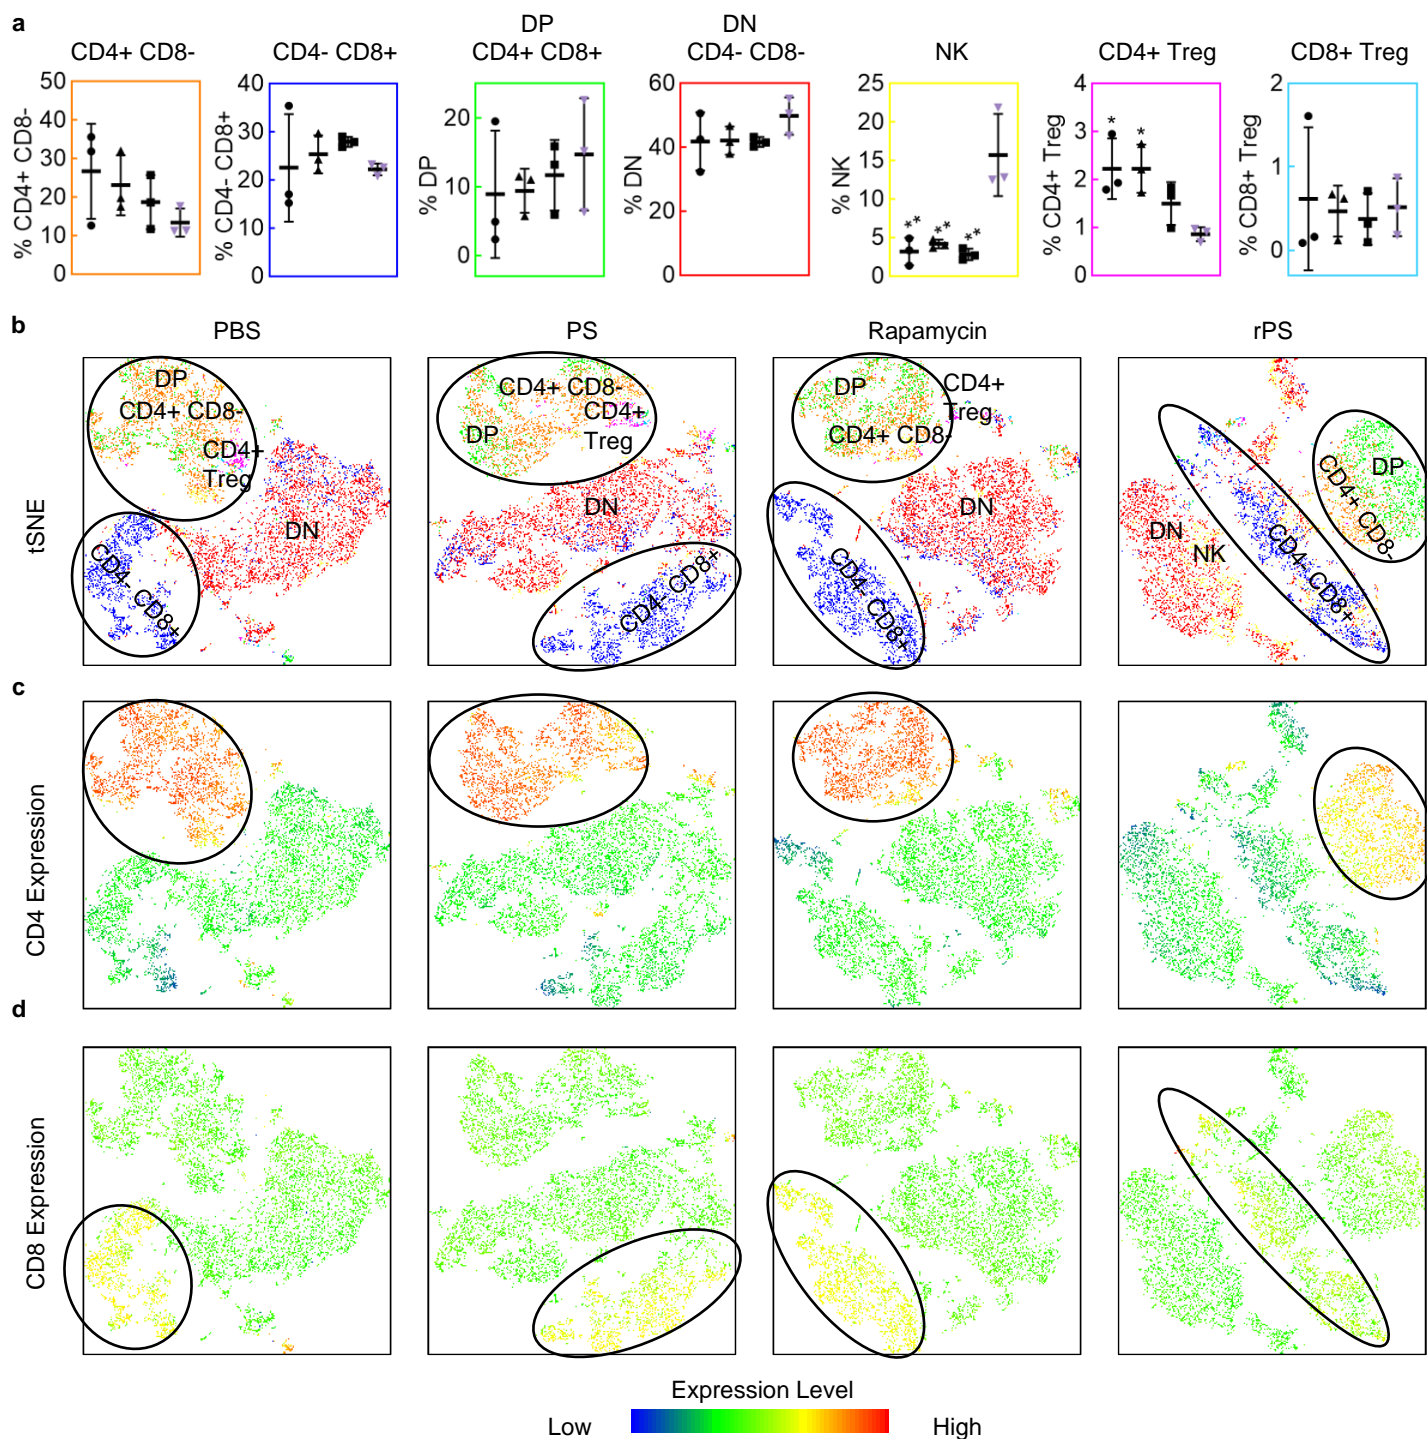

**Fig. S10 | T cell populations in blood.** Flow cytometry analysis of CD3+ T cell populations from mice subcutaneously injected with phosphate buffered saline (PBS; ●), polymersomes (PS; ▲), rapamycin (■) or rapamycin-loaded polymersomes (rPS; ▼) using the standard dosage protocol (11 injections, 1 mg/kg rapamycin or equivalent). **a**, Analysis of CD3+ T cell populations: Percentage of CD3+ T cells (from left to right): CD4+ CD8- (orange), CD4- CD8+ (blue), CD4+ CD8+ double positive (DP; green), CD4- CD8- double negative (DN; red), and natural killer (NK; yellow), CD4+ regulatory (CD4+ Treg; magenta) and CD8+ regulatory (CD8+ Treg; light blue) in blood. All data are presented as mean percentage (of CD3+ cells)  $\pm$  SD with \* $p$ <0.05; \*\* $p$ <0.01; \*\*\* $p$ <0.001; \*\*\*\* $p$ <0.0001 relative to rPS treatment. Statistical significance was determined by one-way ANOVA with Tukey's multiple comparisons test. **b**, tSNE visualization of CD3+ immune cell populations from the liver with color-coded gated overlays of the previously described cell populations: CD4+ CD8- (orange), CD4- CD8+ (blue), CD4+ CD8+ double positive (DP; green), CD4- CD8- double negative (DN; red), and natural killer (NK; yellow), CD4+ regulatory (CD4+ Treg; magenta) and CD8+ regulatory (CD8+ Treg; light blue). **c,d**, tSNE heatmap statistic of CD4 (**c**) and CD8 (**d**) expression. (n=3 mice/group).



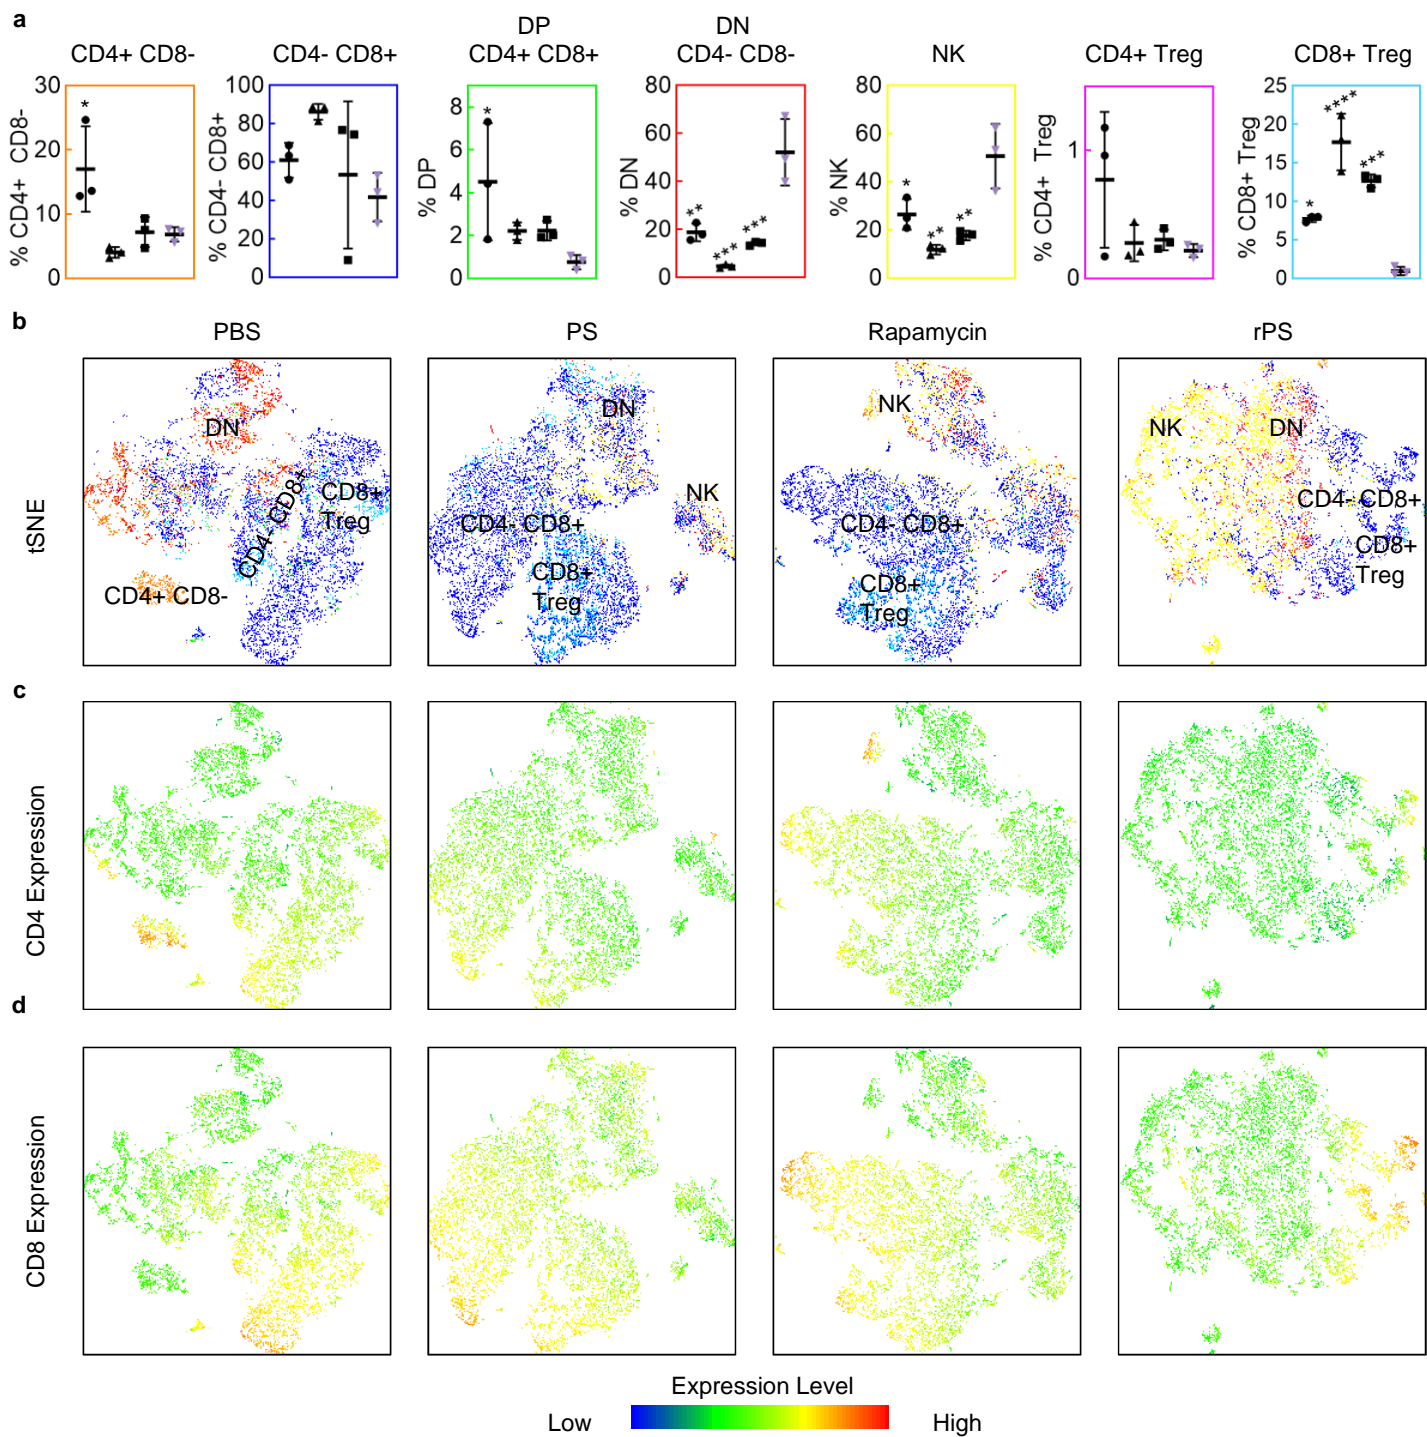

**Fig. S11 | T cell populations in the liver.** Flow cytometry analysis of CD3+ T cell populations from mice subcutaneously injected with phosphate buffered saline (PBS; ●), polymersomes (PS; ▲), rapamycin (■) or rapamycin-loaded polymersomes (rPS; ▼) using the standard dosage protocol (11 injections, 1 mg/kg rapamycin or equivalent). **a**, Analysis of CD3+ T cell populations: Percentage of CD3+ T cells (from left to right): CD4+ CD8- (orange), CD4- CD8+ (blue), CD4+ CD8+ double positive (DP; green), CD4- CD8- double negative (DN; red), and natural killer (NK; yellow), CD4+ regulatory (CD4+ Treg; magenta) and CD8+ regulatory (CD8+ Treg; light blue) in the liver. All data are presented as mean percentage (of CD3+ cells)  $\pm$  SD with \* $p$ <0.05; \*\* $p$ <0.01; \*\*\* $p$ <0.001; \*\*\*\* $p$ <0.0001 relative to rPS treatment. Statistical significance was determined by one-way ANOVA with Tukey's multiple comparisons test. **b**, tSNE visualization of CD3+ immune cell populations from the liver with color-coded gated overlays of the previously described cell populations: CD4+ CD8- (orange), CD4- CD8+ (blue), CD4+ CD8+ double positive (DP; green), CD4- CD8- double negative (DN; red), and natural killer (NK; yellow), CD4+ regulatory (CD4+ Treg; magenta) and CD8+ regulatory (CD8+ Treg; light blue). **c,d**, tSNE heatmap statistic of CD4 (**c**) and CD8 (**d**) expression. (n=3 mice/group).

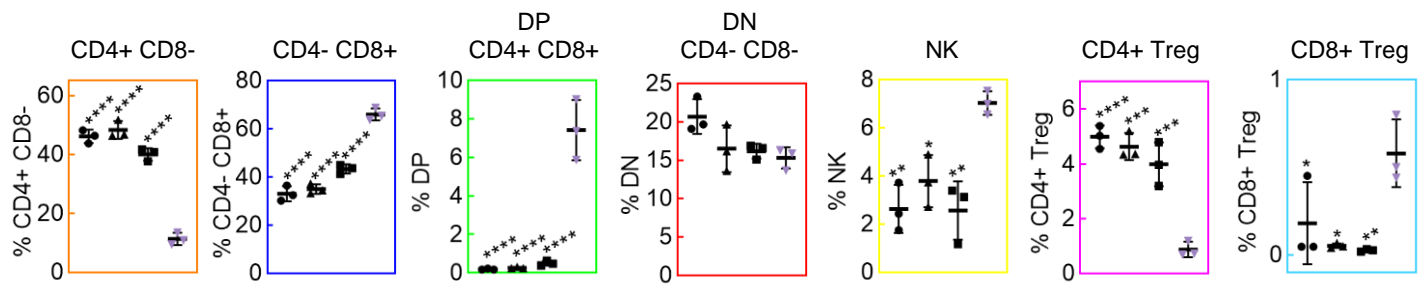

**Fig. S12 | T cell populations in the AX LN.** Flow cytometry analysis of CD3+ T cell populations from mice subcutaneously injected with phosphate buffered saline (PBS; ●), polymersomes (PS; ▲), rapamycin (■) or rapamycin-loaded polymersomes (rPS; ▼) using the standard dosage protocol (11 injections, 1 mg/kg rapamycin or equivalent). **a**, Analysis of CD3+ T cell populations: Percentage of CD3+ T cells (from left to right): CD4+ CD8- (orange), CD4- CD8+ (blue), CD4+ CD8+ double positive (DP; green), CD4- CD8- double negative (DN; red), and natural killer (NK; yellow), CD4+ regulatory (CD4+ Treg; magenta) and CD8+ regulatory (CD8+ Treg; light blue) in the liver. All data are presented as mean percentage (of CD3+ cells)  $\pm$  SD with \* $p<0.05$ ; \*\* $p<0.01$ ; \*\*\* $p<0.001$ ; \*\*\*\* $p<0.0001$  relative to rPS treatment. Statistical significance was determined by one-way ANOVA with Tukey's multiple comparisons test. (n=3 mice/group). AX LN: axillary lymphocenter (deep axillary/axillary/axial and superficial axillary/brachial lymph nodes).



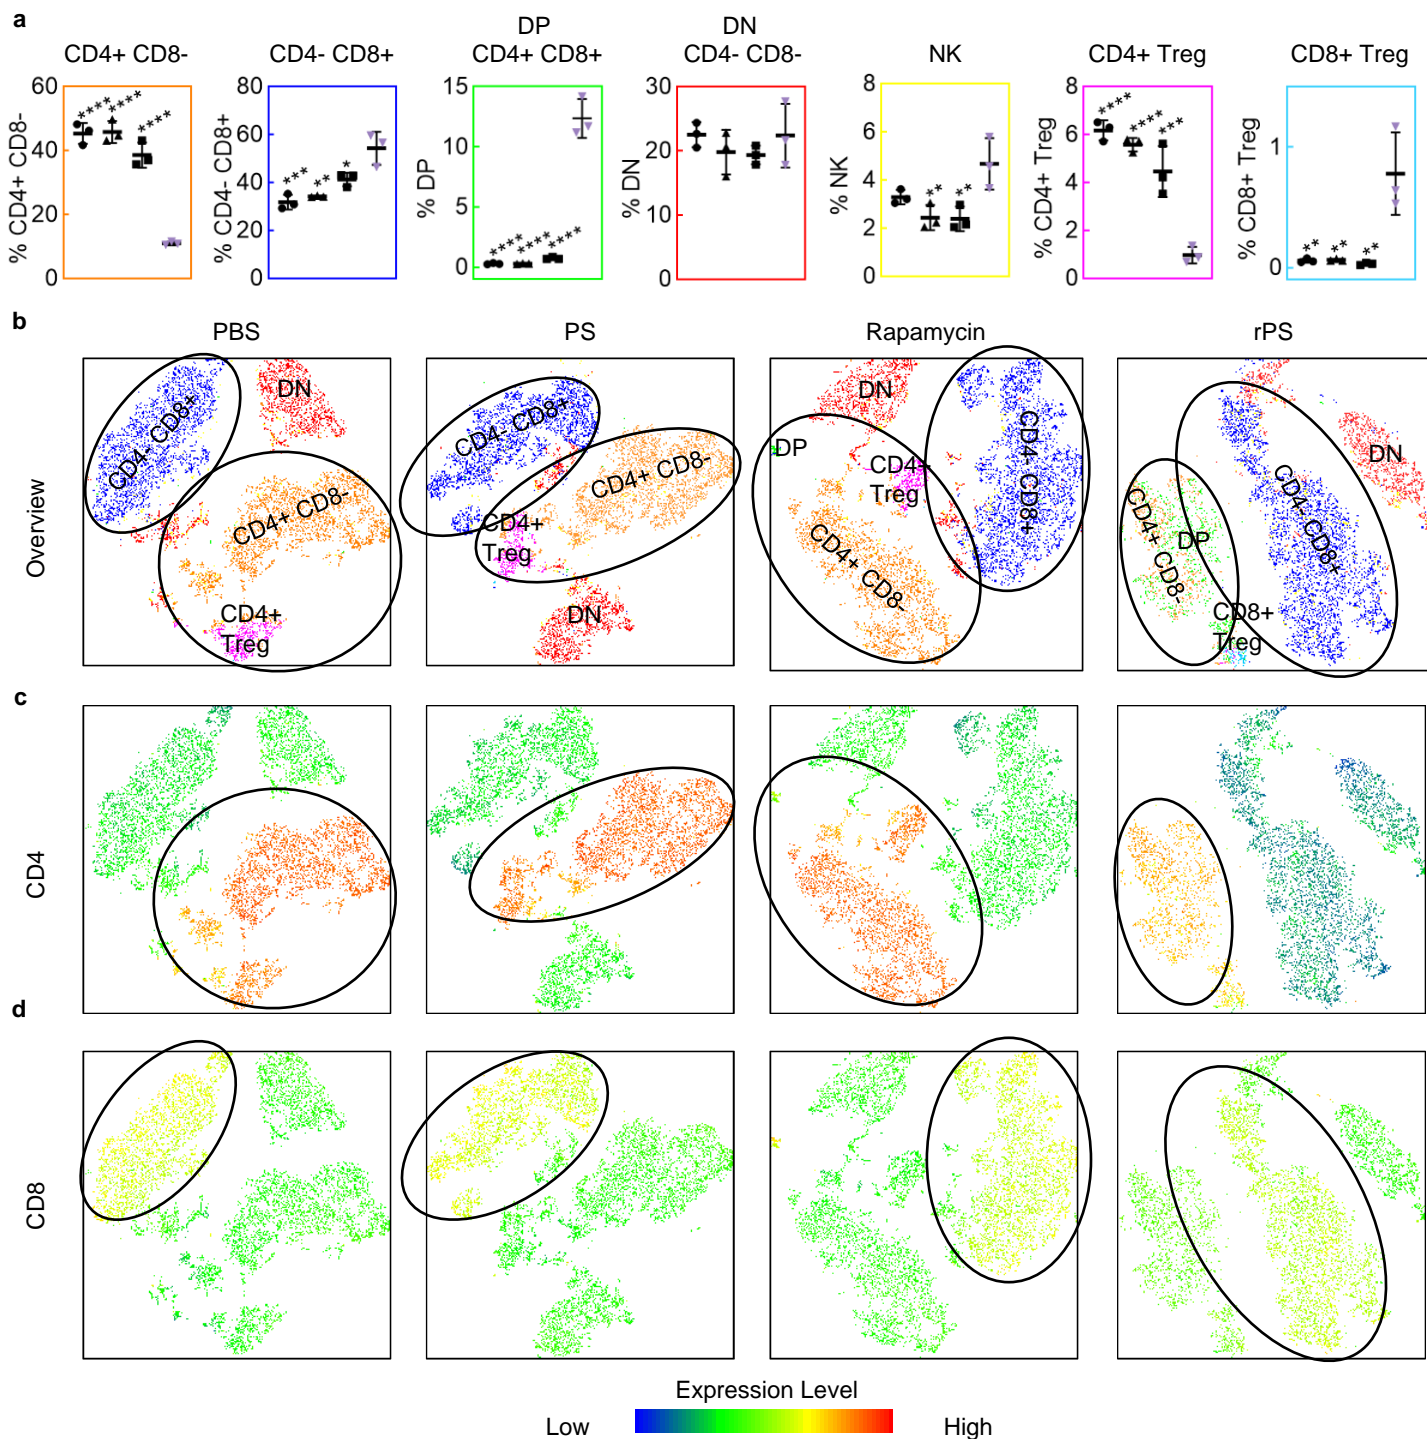

**Fig. S13 | T cell populations in the IN LN.** Flow cytometry analysis of CD3+ T cell populations from mice subcutaneously injected with phosphate buffered saline (PBS; ●), polymersomes (PS; ▲), rapamycin (■) or rapamycin-loaded polymersomes (rPS; ▼) using the standard dosage protocol (11 injections, 1 mg/kg rapamycin or equivalent). **a**, Analysis of CD3+ T cell populations: Percentage of CD3+ T cells (from left to right): CD4+ CD8- (orange), CD4- CD8+ (blue), CD4+ CD8+ double positive (DP; green), CD4- CD8- double negative (DN; red), and natural killer (NK; yellow), CD4+ regulatory (CD4+ Treg; magenta) and CD8+ regulatory (CD8+ Treg; light blue) in the liver. All data are presented as mean percentage (of CD3+ cells)  $\pm$  SD with \* $p < 0.05$ ; \*\*  $p < 0.01$ ; \*\*\*  $p < 0.001$ ; \*\*\*\*  $p < 0.0001$  relative to rPS treatment. Statistical significance was determined by one-way ANOVA with Tukey's multiple comparisons test. **b**, tSNE visualization of CD3+ immune cell populations from the subiliac lymphocenter (subiliac/inguinal lymph nodes; IN LN) with color-coded gated overlays of the previously described cell populations: CD4+ CD8- (orange), CD4- CD8+ (blue), CD4+ CD8+ double positive (DP; green), CD4- CD8- double negative (DN; red), and natural killer (NK; yellow), CD4+ regulatory (CD4+ Treg; magenta) and CD8+ regulatory (CD8+ Treg; light blue). **c,d**, tSNE heatmap statistic of CD4 (**c**) and CD8 (**d**) expression. (n=3 mice/group).

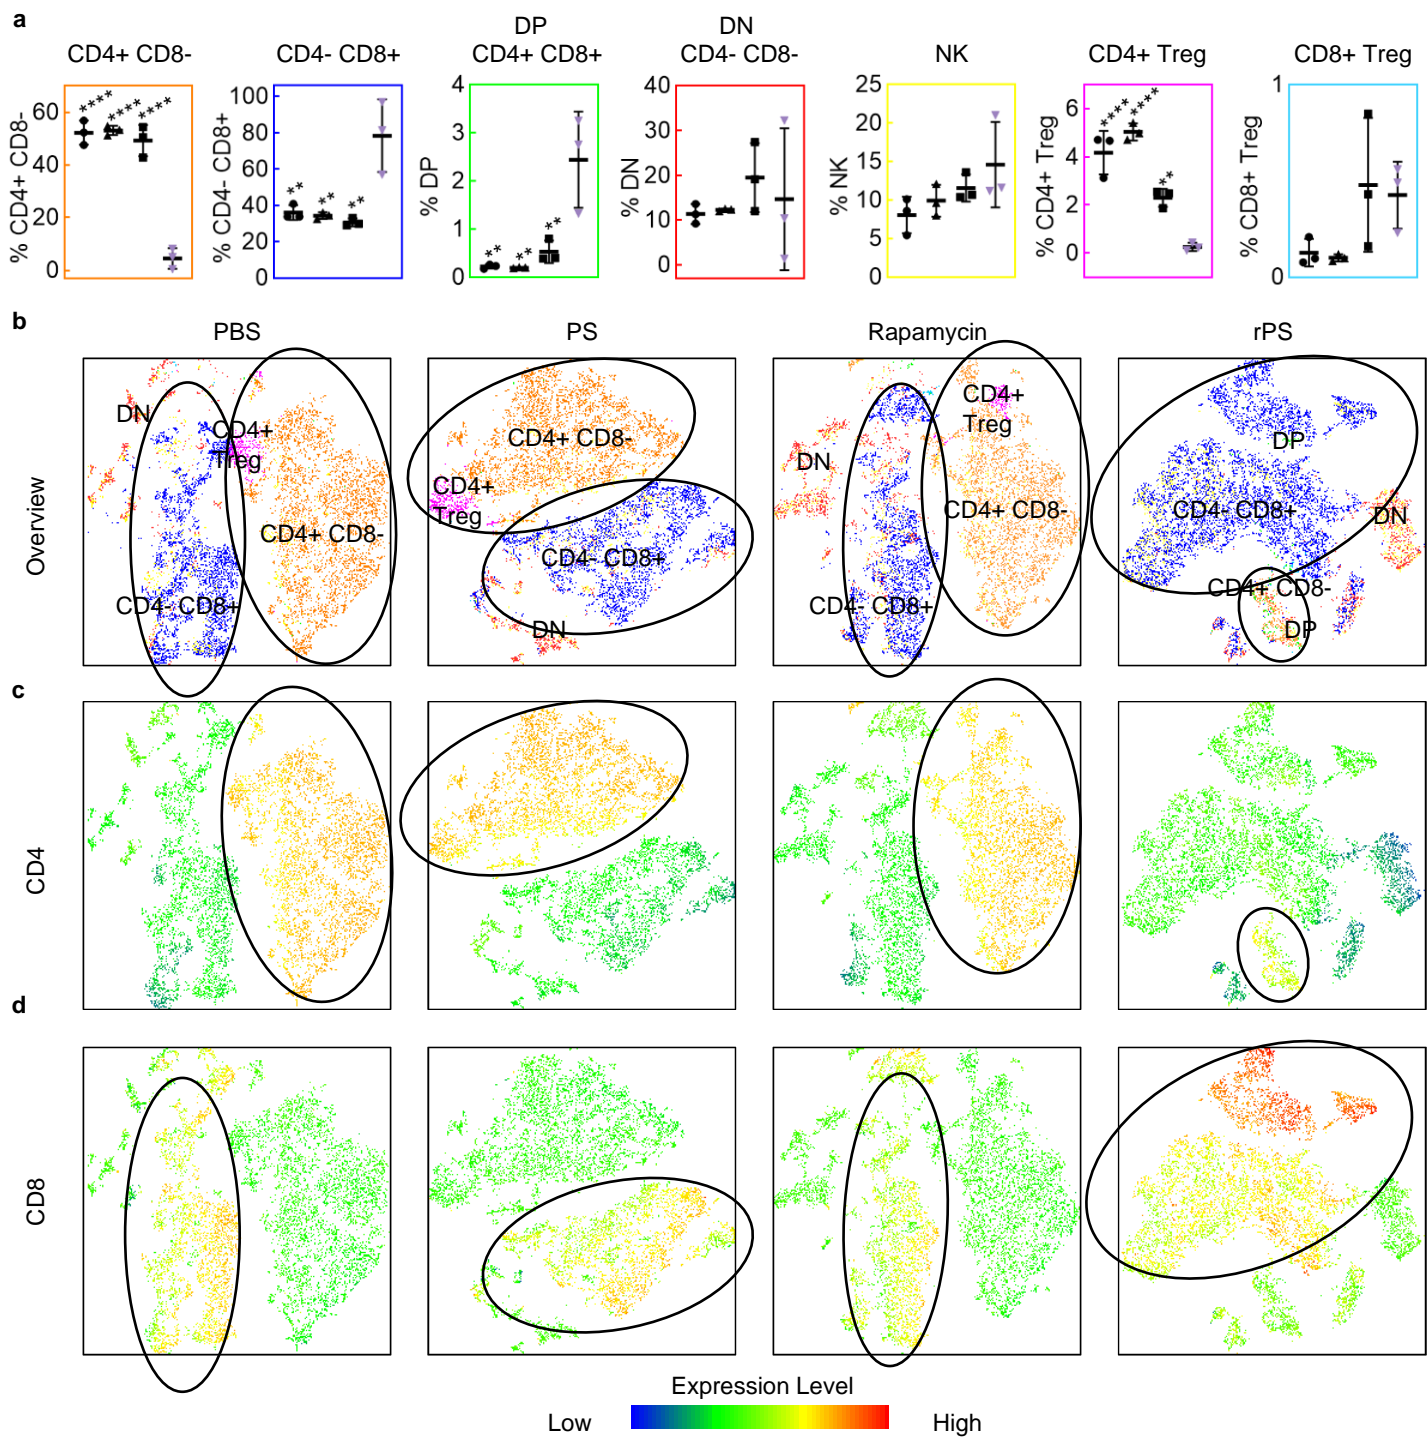

**Fig. S14 | T cell populations in the spleen.** Flow cytometry analysis of CD3+ T cell populations from mice subcutaneously injected with phosphate buffered saline (PBS; ●), polymersomes (PS; ▲), rapamycin (■) or rapamycin-loaded polymersomes (rPS; ▼) using the standard dosage protocol (11 injections, 1 mg/kg rapamycin or equivalent). **a**, Analysis of CD3+ T cell populations: Percentage of CD3+ T cells (from left to right): CD4+ CD8- (orange), CD4- CD8+ (blue), CD4+ CD8+ double positive (DP; green), CD4- CD8- double negative (DN; red), and natural killer (NK; yellow), CD4+ regulatory (CD4+ Treg; magenta) and CD8+ regulatory (CD8+ Treg; light blue) in the liver. All data are presented as mean percentage (of CD3+ cells)  $\pm$  SD with \* $p < 0.05$ , \*\* $p < 0.01$ , \*\*\* $p < 0.001$ , \*\*\*\* $p < 0.0001$  relative to rPS treatment. Statistical significance was determined by one-way ANOVA with Tukey's multiple comparisons test. **b**, tSNE visualization of CD3+ immune cell populations from the spleen with color-coded gated overlays of the previously described cell populations: CD4+ CD8- (orange), CD4- CD8+ (blue), CD4+ CD8+ double positive (DP; green), CD4- CD8- double negative (DN; red), and natural killer (NK; yellow), CD4+ regulatory (CD4+ Treg; magenta) and CD8+ regulatory (CD8+ Treg; light blue). **c,d**, tSNE heatmap statistic of CD4 (**c**) and CD8 (**d**) expression. (n=3 mice/group).

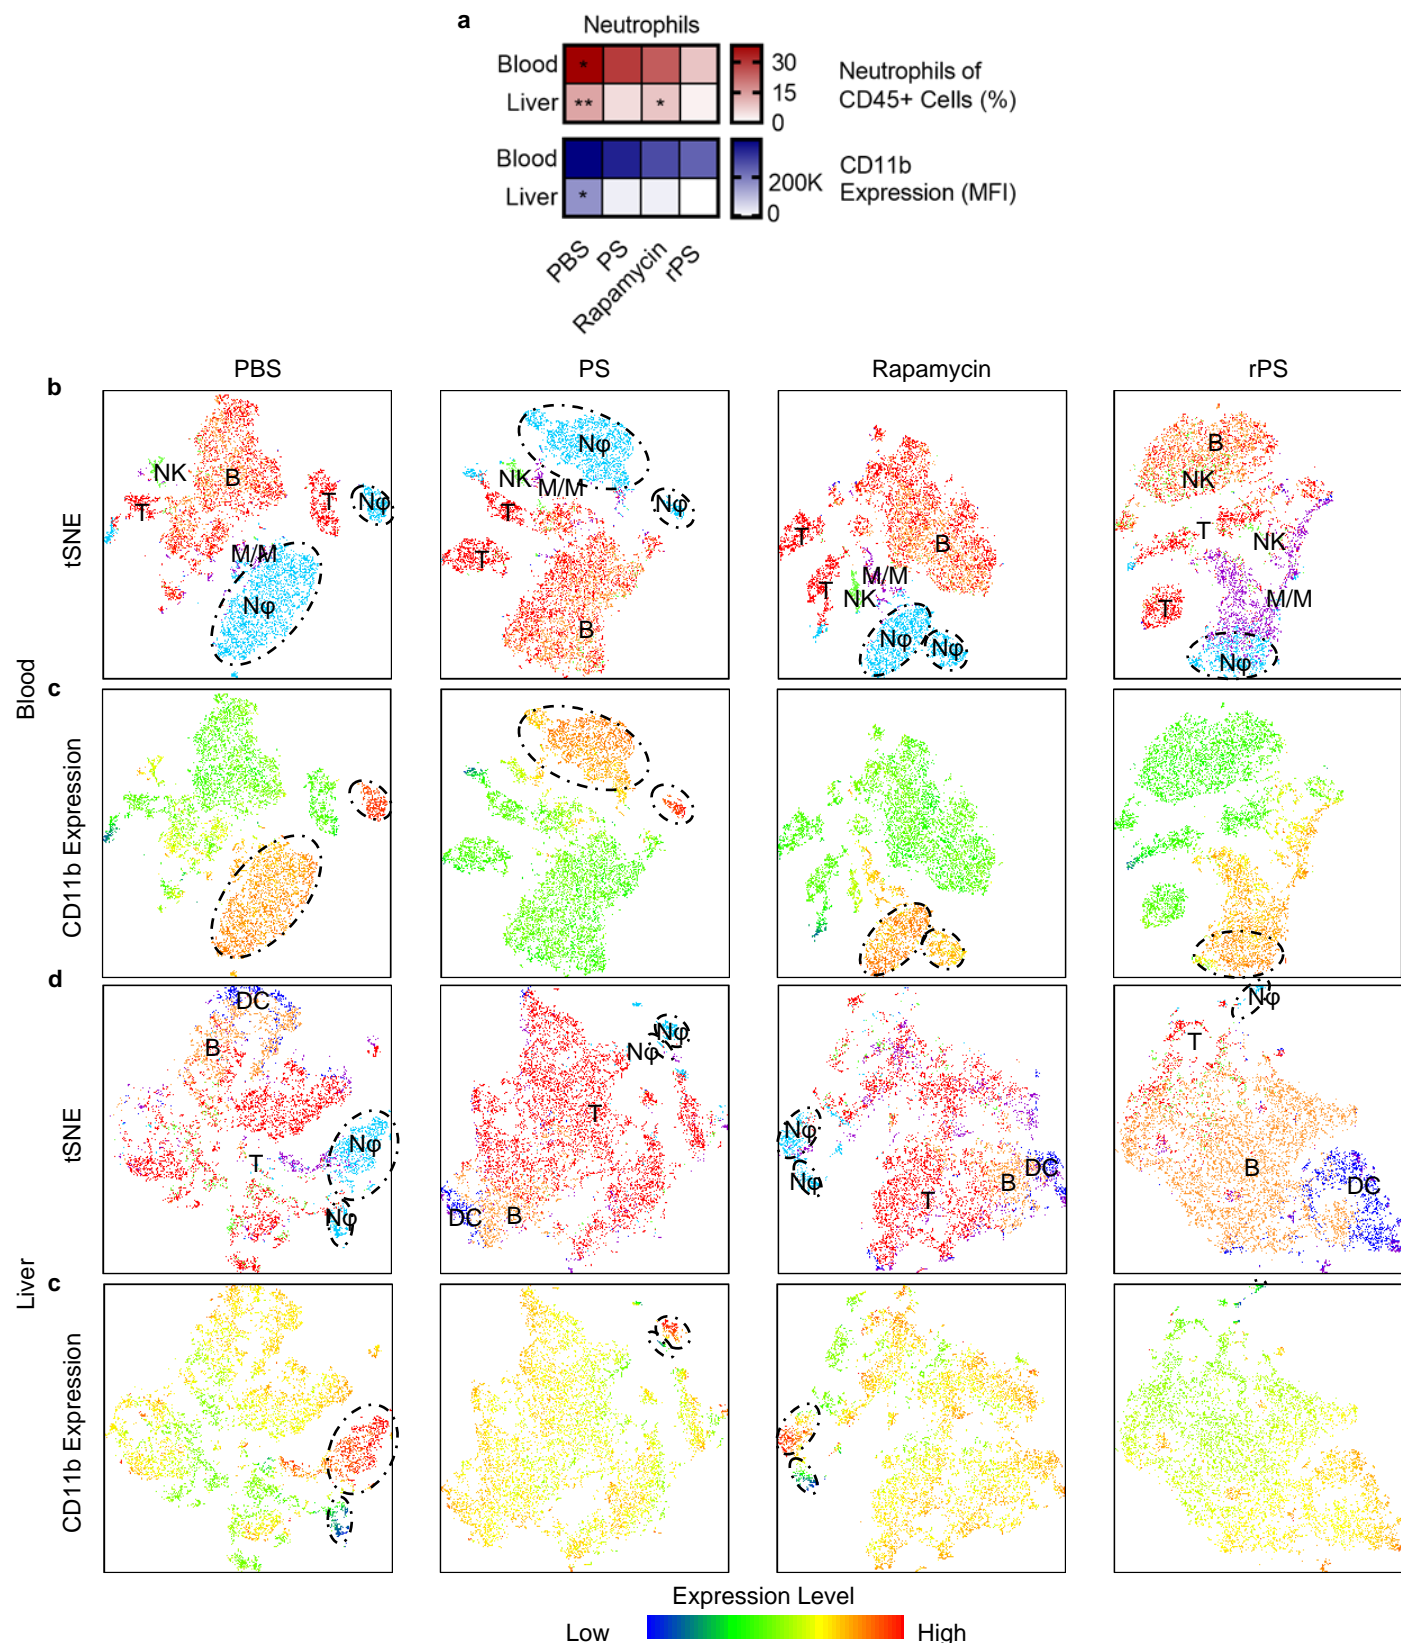

**Fig. S15 | Neutrophil populations in the blood and liver.** Flow cytometry analysis of CD45+ cells from mice subcutaneously injected with phosphate buffered saline (PBS), polymersomes (PS), rapamycin or rapamycin-loaded polymersomes (rPS) using the standard dosage protocol (11 injections, 1 mg/kg rapamycin or equivalent). **a**, Top: Percentage of neutrophils of CD45+ cells in blood and liver. All data are presented as mean percentage (of CD45+ cells)  $\pm$  SD with \* $p$ <0.05; \*\*  $p$ <0.01 relative to rPS treatment. Bottom: CD11b expression by neutrophils in the blood and liver. All data are presented as mean median fluorescent intensity (MFI)  $\pm$  SD with \* $p$ <0.05 relative to rPS treatment. **b,d**, tSNE visualization of CD45+ cells from blood (**b**) and liver (**d**) with color-coded gated overlays of specific cell populations: B cells (B; orange), dendritic cells (DC; blue), monocyte-and-macrophage-lineage cells (M/M; purple), neutrophils (N $\phi$ ; light blue), and T cells (T; red). **c,e**, tSNE heatmap statistic of CD11b for blood (**c**) and liver (**e**). Dashed-line ovals indicate N $\phi$  populations.

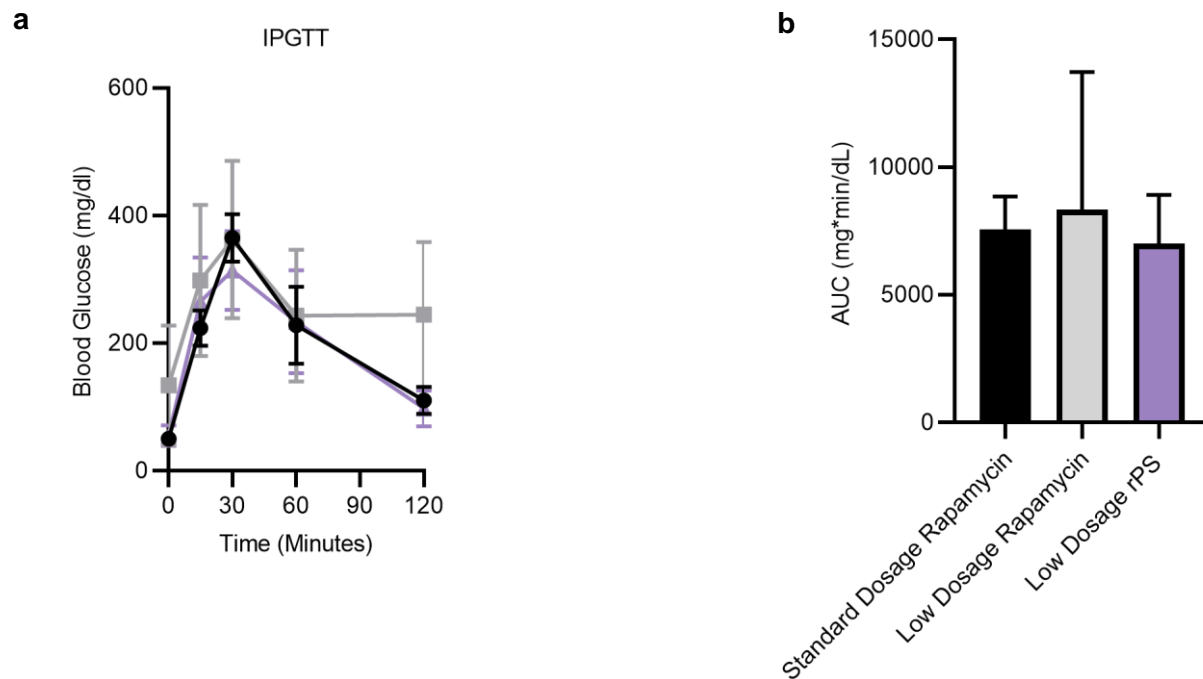

**Fig. S16 | Intraperitoneal glucose tolerance test (IPGTT).** **a**, Blood glucose concentration over time after intraperitoneal glucose challenge. **b**, Area under the curve from IPGTT. (n = 5-7 mice/group). All data is presented as mean  $\pm$  SD.



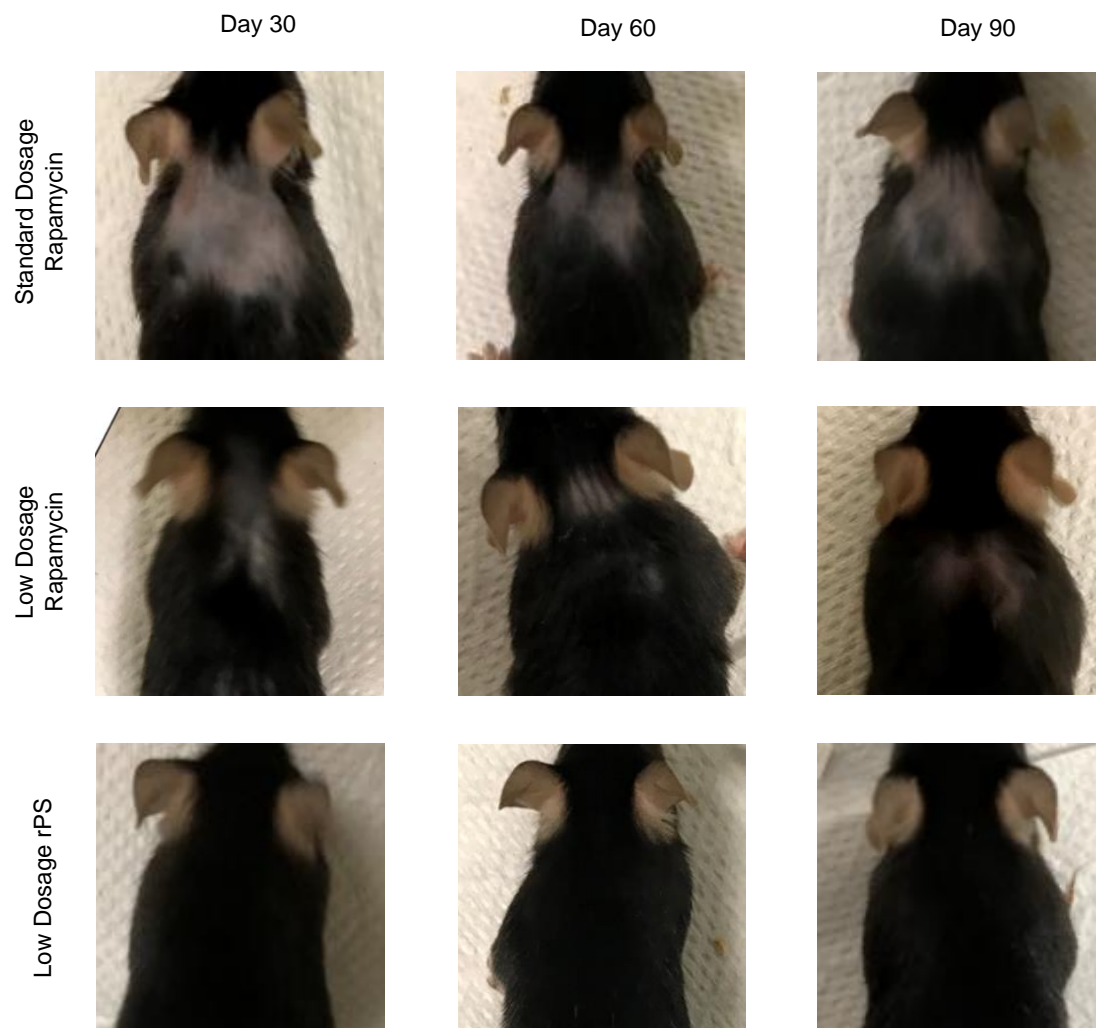

**Fig. S17 | rPS reduce injection site alopecia associated with rapamycin.** (n = 5-7 mice/group).

**Table S1 | Single-cell RNA sequencing analysis workflow**

| Workflow                                            | Program              | Command Line                                                                                                                                                                                                                                                                                                                                                                                                                                                                                                                                                      |
|-----------------------------------------------------|----------------------|-------------------------------------------------------------------------------------------------------------------------------------------------------------------------------------------------------------------------------------------------------------------------------------------------------------------------------------------------------------------------------------------------------------------------------------------------------------------------------------------------------------------------------------------------------------------|
| Quality Control                                     | FastQC<br>v0.11.5    | fastqc <input_path_to/untrimmed.fq.gz>                                                                                                                                                                                                                                                                                                                                                                                                                                                                                                                            |
| Trimming and Filtering                              | Trimmomatic<br>v0.39 | java -jar ./Trimmomatic-0.39/trimmomatic-0.39.jar SE -threads 16 -phred33 <input_path_to/untrimmed.fq.gz> <output_path_to/trimmed.fq.gz> ILLUMINACLIP:TruSeq3-SE.fa:2:30:10 LEADING:30 TRAILING:30 MINLEN:36                                                                                                                                                                                                                                                                                                                                                      |
| Alignment                                           | STAR<br>v2.6.0a      | STAR --genomeDir ../star_index/ --readFilesCommand zcat --readFilesIn <input_path_to/trimmed.fq.gz> --outFilterType BySJout --runThreadN 16 --outFilterMultimapNmax 100 --alignSJoverhangMin 8 --alignSJDBoverhangMin 1 --outFilterMismatchNoverLmax 0.05 --alignIntronMin 20 --alignIntronMax 1000000 --alignMatesGapMax 1000000 --outSAMattributes NH HI NM MD --outSAMstrandField intronMotif --outSAMmapqUnique 60 --outSAMtype BAM SortedByCoordinate --outReadsUnmapped Fastx --limitBAMsortRAM 30000000000 --outFileNamePrefix <output_path_to/sorted_bam> |
| Quantification and Differential Expression Analysis | Cufflinks<br>v2.2.1  | cuffdiff -L PBS,PS,R,RPS -o &lt;path_to/output_dir/> -p 16 -b ../genome_fasta/GRCm38.primary_assembly.genome.fa -u ../GTF/genecode.vM24.primary_assembly.annotation.gtf<br>treatment_1_sample_1.bam,treatment_1_sample_2.bam,treatment_1_sample_3.bam<br>treatment_2_sample_1.bam,treatment_2_sample_2.bam,treatment_2_sample_3.bam<br>treatment_3_sample_1.bam,treatment_3_sample_2.bam,treatment_3_sample_3.bam<br>treatment_4_sample_1.bam,treatment_4_sample_2.bam,treatment_4_sample_3.bam                                                                   |

**Table S2 | Single-cell RNA sequencing raw data**

| Spleen Macrophages             |                    |              | PS          |         | Rapamycin   |         | rPS         |         | Rapamycin vs rPS |         |
|--------------------------------|--------------------|--------------|-------------|---------|-------------|---------|-------------|---------|------------------|---------|
|                                | Ensembl Code       | Geneset Name | Fold Change | P Value | Fold Change | P Value | Fold Change | P Value | Fold Change      | P Value |
| 2279                           | ENSMUSG00000020053 | IGF1         | -6.39305    | 0.01815 | -9.10778    | 0.00425 | -6.03822    | 0.02255 | 3.06956          | 0.02915 |
| 10384                          | ENSMUSG00000036561 | PPP6R2       | -5.69947    | 0.011   | -24         | 0.00005 | -5.5058     | 0.01425 | 24               | 0.00005 |
| 5190                           | ENSMUSG00000025786 | ZDHHC3       | -5.15342    | 0.02015 | -8.14259    | 0.03895 | -4.23154    | 0.04065 | 3.91105          | 0.0462  |
| 2460                           | ENSMUSG00000020346 | MGAT1        | -2.54064    | 0.0472  | 5.0747      | 0.0171  | -3.04016    | 0.01425 | -8.11486         | 0.001   |
| Spleen CD4+ Regulatory T Cells |                    |              | PS          |         | Rapamycin   |         | rPS         |         | Rapamycin vs rPS |         |
|                                | Ensembl Code       | Geneset Name | Fold Change | P Value | Fold Change | P Value | Fold Change | P Value | Fold Change      | P Value |
| 573                            | ENSMUSG00000003379 | CD79A        | -2.52198    | 0.0419  | -24         | 0.00005 | -4.38266    | 0.00455 | 24               | 0.00005 |
| 4444                           | ENSMUSG00000024353 | MZB1         | -2.06991    | 0.0297  | -24         | 0.00005 | -2.50151    | 0.0115  | 24               | 0.00005 |
| 947                            | ENSMUSG00000006134 | CRKL         | -0.689499   | 0.4598  | 7.38707     | 0.02155 | -1.97122    | 0.04935 | -9.3583          | 0.00525 |
| 12235                          | ENSMUSG00000041417 | PIK3R1       | 1.96275     | 0.0626  | -12         | 0.00005 | 3.12528     | 0.07685 | 12               | 0.00005 |
| Liver Macrophages              |                    |              | PS          |         | Rapamycin   |         | rPS         |         | Rapamycin vs rPS |         |
|                                | Ensembl Code       | Geneset Name | Fold Change | P Value | Fold Change | P Value | Fold Change | P Value | Fold Change      | P Value |
| 1331                           | ENSMUSG00000010651 | ACAA1        | -2.44129    | 0.0089  | -3.83338    | 0.0077  | -1.23789    | 0.03675 | 2.5955           | 0.0395  |
